# Supplementary material for: Synthesis and photochromic behaviour of a series of benzopyrans bearing an N-phenyl-carbazole moiety: photochromism control by the steric effect
Source: Royal Society of Chemistry journal article supplement (doi:10.1039/d0pp00202j), 2020-07-21
Supplement: d0pp00202j1.pdf [file d0pp00202j1.pdf]

# Supporting information

## CONTENT

|                                                   |     |
|---------------------------------------------------|-----|
| GENERAL METHODS FOR SYNTHESIS.....                | S2  |
| SYNTHESIS.....                                    | S3  |
| X-RAY STRUCTURE OF CN-Ph-H (CCDC = 1998515) ..... | S12 |
| THEORETICAL CALCULATIONS .....                    | S13 |
| RMN SPECTRA.....                                  | S26 |
| UV-VIS MEASUREMENTS .....                         | S39 |
| REFERENCES .....                                  | S41 |

## GENERAL METHODS FOR SYNTHESIS

---

All reactions were carried out under argon. Dichloromethane was distilled from  $P_2O_5$ , THF and toluene were distilled over Na/benzophenone. Dichloromethane and toluene were kept over activated 3Å molecular sieves. 1,2-Dichloroethane was dried over activated 3Å molecular sieves. All commercial reagents were used without further purification.  $^1H$  and  $^{13}C$  NMR spectra were recorded at room temperature on Bruker Avance-300 MHz NMR spectrometer.  $^1H$  NMR spectra were recorded at 300 MHz and  $^{13}C$  NMR spectra were recorded at 75 MHz. Chloroform residual peak was taken as internal reference at 7.26 ppm for  $^1H$  NMR and 77 ppm for  $^{13}C$  NMR. Acetone residual peak was taken as internal reference at 2.09 ppm for  $^1H$  NMR and 205.87 ppm for  $^{13}C$  NMR. DMSO residual peak was taken as internal reference at 2.54 ppm for  $^1H$  NMR and 40.45 ppm for  $^{13}C$  NMR. High-resolution mass spectra were obtained by using Waters Xevo Q-ToF using positive mode. Infrared spectra were recorded from Nicolet 6700 FT-IR spectrometer.

## SYNTHESIS

---

### Compound 1 (2-methoxy-11H-benzo[a]carbazole)

**Compound 1** was prepared in two steps from 7-methoxy-1-tetralone according to a published procedure.<sup>1</sup>

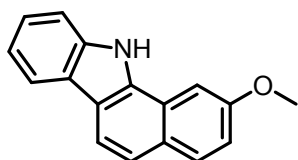

<sup>1</sup>H NMR (300 MHz, Acetone)  $\delta$  11.23 (s, 0.5H), 8.22 – 8.16 (m, 1H), 8.09 (d,  $J$  = 8.5 Hz, 1H), 7.97 (t,  $J$  = 6.2 Hz, 2H), 7.65 (dd,  $J$  = 8.1, 7.2 Hz, 2H), 7.44 (ddd,  $J$  = 8.2, 7.1, 1.2 Hz, 1H), 7.28 (ddd,  $J$  = 8.0, 7.2, 1.0 Hz, 1H), 7.22 (dd,  $J$  = 8.9, 2.6 Hz, 1H), 4.03 (s, 3H). <sup>13</sup>C NMR (75 MHz, Acetone)  $\delta$  158.38, 139.69, 135.67, 130.72, 128.08, 125.08, 124.52, 123.07, 120.19, 119.93, 119.75, 118.92, 117.43, 117.20, 111.66, 111.60, 101.43, 55.39.

### Compound 2 (2-methoxy-11-phenyl-11H-benzo[a]carbazole)

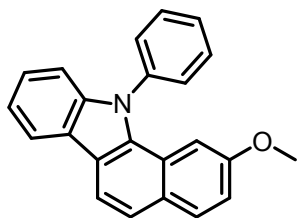

2-methoxy-11H-benzo[a]carbazole (0.2g, 0.8mmol), iodobenzene (0.198g, 0.97mmol), K<sub>3</sub>PO<sub>4</sub> (0.36g, 1.70mmol) and toluene (3mL) were added to a monocol flask. The resulting mixture was degassed for 30 min then racemic cyclohexane-1,2-diamine (40 $\mu$ L, 0.35mmol) and CuI (18.5mg, 0.097mmol) were added. After 24 hours of heating at 110°C under argon, the reaction mixture was cooled to ambient temperature, diluted with dichloromethane and filtered through a plug of silica gel. The filtrate was concentrated and the resulting residue was purified by column chromatography on silica gel (Petroleum ether/CH<sub>2</sub>Cl<sub>2</sub>: 50/50) to provide the desired product (0.210 g, 80%). M.p.: 130-131 °C; <sup>1</sup>H NMR (300 MHz, CDCl<sub>3</sub>)  $\delta$  8.21 (dd,  $J$  = 6.9, 1.4 Hz, 1H), 8.12 (d,  $J$  = 8.5 Hz, 1H), 7.89 (d,  $J$  = 8.9 Hz, 1H), 7.74 – 7.55 (m, 6H), 7.44 – 7.33 (m, 2H), 7.25 – 7.19 (m, 1H), 7.09 (dd,  $J$  = 8.9, 2.5 Hz, 1H), 6.79 (d,  $J$  = 2.5 Hz, 1H), 3.42 (s, 3H); <sup>13</sup>C NMR (75 MHz, CDCl<sub>3</sub>)  $\delta$  156.72, 142.01, 140.07, 134.89, 130.44, 129.90, 129.60, 128.70, 128.43, 124.98, 123.38, 122.61, 120.88, 120.13, 119.86, 119.63, 116.83, 116.63, 110.20, 101.65, 54.44; HRMS (ESI):  $m/z$  calcd for C<sub>23</sub>H<sub>18</sub>NO+H<sup>+</sup>: 324.1388 [ $M$ +H<sup>+</sup>]; found: 324.1401.

### Compound 3 (11-phenyl-11H-benzo[a]carbazol-2-ol)

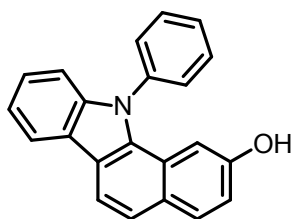

2-methoxy-11-phenyl-11H-benzo[*a*]carbazole (2.1g, 6.49mmol) and CH<sub>2</sub>Cl<sub>2</sub> (60mL) were added to a monocol flask. Then, BBr<sub>3</sub> (19.48mL, 1M in hexane) was added at room temperature. After 2 hours of stirring under argon, the reaction mixture was cooled down by an icy bath then quenched carefully with water. The aqueous phase was extracted twice with CH<sub>2</sub>Cl<sub>2</sub> then the combined organic phase was washed twice with water. After drying over MgSO<sub>4</sub>, filtered and concentrated under vacuum, the crude product was purified by column chromatography on silica gel (100% CH<sub>2</sub>Cl<sub>2</sub>) to provide the desired product (1.91 g, 95%). M.p.: 159.5-160.5 °C; <sup>1</sup>H NMR (300 MHz, DMSO) δ 9.61 (s, 1H), 8.29 (d, *J* = 7.5 Hz, 1H), 8.14 (d, *J* = 8.5 Hz, 1H), 7.93 (d, *J* = 8.8 Hz, 1H), 7.85 – 7.71 (m, 3H), 7.70 (d, *J* = 8.5 Hz, 1H), 7.65 – 7.58 (m, 2H), 7.48 – 7.28 (m, 2H), 7.16 – 7.02 (m, 2H), 6.68 (d, *J* = 2.1 Hz, 1H); <sup>13</sup>C NMR (75 MHz, DMSO) δ 154.67, 141.57, 139.18, 133.88, 130.53, 130.28, 129.01, 128.62, 127.30, 125.12, 122.89, 122.87, 121.17, 120.17, 119.73, 119.09, 116.75, 115.78, 110.06, 104.88; HRMS (ESI): *m/z* calcd for C<sub>22</sub>H<sub>15</sub>NO+H<sup>+</sup>: 310.1232 [*M*+H<sup>+</sup>]; found: 310.1238.

### Compound 4 (4-(dipyridin-2-ylamino)benzophenone)

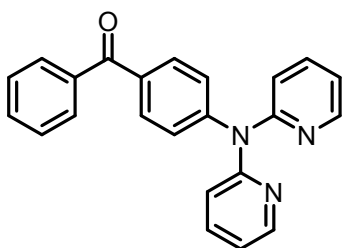

2,2'-dipyridylamine (1.57g, 9.19mmol) and 4-bromobenzophenone (2g, 7.65mmol) were dissolved in 50 mL of dichloromethane in a monocol flask. Then, K<sub>2</sub>CO<sub>3</sub> (2.11g, 15.26mmol) dissolved in water (20mL) and CuSO<sub>4</sub> (0.132g, 8.27mmol) in water (10mL) were added. After drying under vacuum, the reaction mixture was heated at 225°C for 8h under argon. The reaction mixture was cooled to ambient temperature, diluted with dichloromethane and the resulting mixture was washed with water, dried over MgSO<sub>4</sub> and concentrated. The crude product was purified by column chromatography on silica gel (CH<sub>2</sub>Cl<sub>2</sub>/ Et<sub>2</sub>O, 80 / 20) to provide the desired product (2.20g, 82%). M.p. 111.5-112.5 °C; <sup>1</sup>H NMR (300 MHz, CDCl<sub>3</sub>) δ 8.38 (ddd, *J* = 4.9, 1.9, 0.8 Hz, 2H), 7.86 – 7.77 (m, 4H), 7.67 – 7.52 (m, 3H), 7.50 – 7.42 (m, 2H), 7.24 – 7.17 (m, 2H), 7.09 – 6.98 (m, 4H); <sup>13</sup>C NMR (75 MHz, CDCl<sub>3</sub>) δ 195.41, 157.54, 148.96, 148.86,

137.99, 137.84, 133.12, 132.04, 131.73, 129.77, 128.17, 124.60, 119.29, 118.03; HRMS (ESI):  $m/z$  calcd for  $C_{23}H_{17}N_3O+H^+$ : 352.1450 [ $M+H^+$ ]; found: 352.1440.

### Compound 5 (4-(diphenylamino)benzophenone)

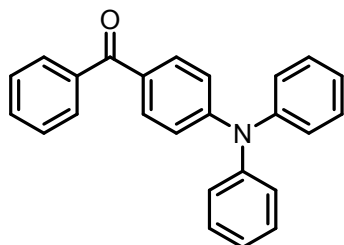

Diphenylamine (1.62g, 9.57mmol) and 4-bromobenzophenone (2g, 7.65mmol) were dissolved in 50 mL of dichloromethane in a monocol flask. Then,  $K_2CO_3$  (2.11g, 15.26mmol) dissolved in water (20mL) and  $CuSO_4$  (0.132g, 8.27mmol) in water (10mL) were added. Then, the reaction mixture was heated at 225°C for 24h under argon. The reaction mixture was cooled to ambient temperature, diluted with dichloromethane and the resulting mixture was washed with water, dried over  $MgSO_4$  and concentrated. The crude product was purified by column chromatography on silica gel ( $CH_2Cl_2 / Et_2O$ , 50 / 50) to provide the desired product (0.90g, 33%).  $^1H$  NMR (300 MHz,  $CDCl_3$ )  $\delta$  7.74 (m, 4H), 7.55 (m, 1H), 7.46 (m, 2H), 7.33 (m, 4H), 7.16 (m, 6H), 7.05 – 6.98 (m, 2H);  $^{13}C$  NMR (75 MHz,  $CDCl_3$ )  $\delta$  195.20, 151.90, 146.47, 138.44, 131.95, 131.67, 129.62, 129.59, 129.50, 128.10, 125.96, 124.61, 119.50.

### Compound 6 (1-(4-methoxyphenyl)-1-phenylprop-2-yn-1-ol)

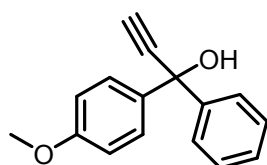

Ethynyltrimethylsilane (2.77g, 28mmol) and THF (45mL) were added to a three-necked flask. The resulting mixture was cooled at -20°C. Then, *n*-BuLi (15.90mL, 1.6M in Hexane) was added dropwise. After 1hour of stirring between -10°C and 0°C, 4-methoxy-benzophenone (3g, 14.1mmol) was added in powder. The reaction was stirred for 30 min. Then the reaction was quenched with a saturated ammonium sulphate aqueous solution and diluted with diethyl ether (200mL). The organic phase was washed three times with water, dried over  $MgSO_4$  and concentrated under vacuum. Then, the resulting product was dissolved in methanol and  $K_2CO_3$  (11.72g, 84.8mmol) was added. After 1h of stirring, water and diethyl ether was added. The organic phase was washed three times with water, dried over  $MgSO_4$  and concentrated under vacuum to provide the desired compound (3.22g, 96%) that was used without further purification. Viscous oil;  $^1H$  NMR (300 MHz,  $CDCl_3$ )  $\delta$  7.64 – 7.57 (m, 2H), 7.56 – 7.47 (m, 2H),

7.39 – 7.26 (m, 3H), 6.91 – 6.81 (m, 2H), 3.79 (s, 3H), 2.87 (s, 1H), 2.83 (s, 1H);  $^{13}\text{C}$  NMR (75 MHz,  $\text{CDCl}_3$ )  $\delta$  159.15, 144.55, 136.69, 128.24, 127.75, 127.35, 125.90, 113.56, 86.53, 73.92, 55.26; HRMS (ESI):  $m/z$  calcd for  $\text{C}_{16}\text{H}_{14}\text{O}_2 + \text{H}^+$ : 239.1072 [ $M + \text{H}^+$ ]; found: 239.1095

**Compound 7** (1-(4-(dimethylamino)phenyl)-1-phenylprop-2-yn-1-ol)

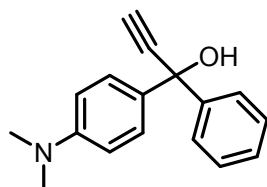

Ethynyltrimethylsilane (2.61g, 26.6mmol) and THF (45mL) were added to a three-necked flask. The resulting mixture was cooled at  $-20^\circ\text{C}$ . Then, *n*-BuLi (16.64mL, 1.6M in Hexane) was added dropwise. After 1hour of stirring between  $-10^\circ\text{C}$  and  $0^\circ\text{C}$ , 4-(dimethylamino)-benzophenone (3g, 13.3mmol) was added in powder. The reaction was stirred for 30 min. Then the reaction was quenched with a saturated ammonium sulphate aqueous solution and diluted with diethylether (200mL). The organic phase was washed three times with water, dried over  $\text{MgSO}_4$  and concentrated under vacuum. Then, the resulting product was dissolved in methanol and  $\text{K}_2\text{CO}_3$  (11.03mmol, 79.8mmol) was added. After 1hour of stirring, water and diethyl ether were added. The organic phase was washed three times with water, dried over  $\text{MgSO}_4$  and concentrated under vacuum to provide the desired compound (3.18g, 95%) that was used without further purification. M.p.  $121\text{--}123^\circ\text{C}$ ;  $^1\text{H}$  NMR (300 MHz,  $\text{CDCl}_3$ )  $\delta$  7.67 – 7.56 (m, 2H), 7.48 – 7.39 (m, 2H), 7.39 – 7.23 (m, 3H), 6.72 – 6.64 (m, 2H), 2.94 (s, 6H), 2.85 (s, 1H), 2.78 (s, 1H);  $^{13}\text{C}$  NMR (75 MHz,  $\text{CDCl}_3$ )  $\delta$  150.11, 144.82, 132.30, 128.12, 127.51, 127.01, 125.95, 112.00, 86.89, 74.88, 74.02, 40.48.

**Compound 8** (1-(4-(dipyridin-2-ylamino)phenyl)-1-phenylprop-2-yn-1-ol)

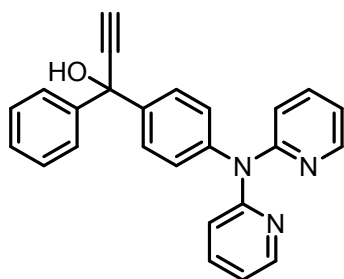

Ethynyltrimethylsilane (1.5g, 15. mmol) and THF (30mL) were added to a three-necked flask. The resulting mixture was cooled at  $-20^\circ\text{C}$ . Then, *n*-BuLi (9.56mL, 1.6M in Hexane) was added dropwise. After 1hour of stirring between  $-10^\circ\text{C}$  and  $0^\circ\text{C}$ , the lithium acetylide was transferred via cannula to another flask pre-cooled at  $0^\circ\text{C}$  containing **compound 4** (1.8g, 5.12mmol) and THF (20mL). The reaction was stirred for 30 min. Then the reaction was quenched with a

saturated ammonium sulphate aqueous solution and diluted with diethylether. The organic phase was washed three times with water, dried over  $\text{MgSO}_4$  and concentrated under vacuum. Then, the resulting product was dissolved in methanol/THF (50/50) and  $\text{K}_2\text{CO}_3$  (4.24g, 30.72mmol) was added. After 1 hour of stirring, water and diethyl ether were added. The organic phase was washed three times with water, dried over  $\text{MgSO}_4$  and concentrated under vacuum to provide the desired compound in quantitative yield that was used without further purification. M.p. 182.-182.5 °C;  $^1\text{H}$  NMR (300 MHz, Acetone)  $\delta$  8.27 – 8.18 (m, 2H), 7.74 (ddd,  $J = 4.4, 3.5, 1.9$  Hz, 2H), 7.71 – 7.61 (m, 4H), 7.42 – 7.35 (m, 2H), 7.34 – 7.26 (m, 1H), 7.16 – 7.11 (m, 2H), 7.04 – 6.98 (m, 4H), 3.43 (s, 1H);  $^{13}\text{C}$  NMR (75 MHz, Acetone)  $\delta$  158.65, 148.60, 146.40, 144.92, 143.34, 137.86, 128.53, 127.79, 127.52, 127.25, 126.42, 118.64, 117.37, 75.92; HRMS (ESI):  $m/z$  calcd for  $\text{C}_{25}\text{H}_{20}\text{N}_3\text{O}+\text{H}^+$ : 378.1606 [ $M+\text{H}^+$ ]; found: 378.1608

**Compound 9** (1-(4-(diphenylamino)phenyl)-1-phenylprop-2-yn-1-ol)

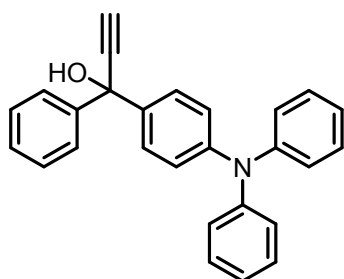

Ethynyltrimethylsilane (0.42g, 4.30mmol) and THF (10mL) were added to a three-necked flask under argon. The resulting mixture was cooled at  $-20^\circ\text{C}$ . Then,  $n\text{-BuLi}$  (2.65mL, 1.6M in Hexane) was added dropwise. After 1hour of stirring between  $-10^\circ\text{C}$  and  $0^\circ\text{C}$ , the lithium acetylide was transferred via cannula to another flask pre-cooled at  $0^\circ\text{C}$  containing **compound 5** (0.75g, 2.15mmol) and THF (20mL). The reaction was stirred for 1hour. Then the reaction was quenched with a saturated ammonium sulfate aqueous solution and diluted with diethylether. The organic phase was washed three times with water, dried over  $\text{MgSO}_4$  and concentrated under vacuum. Then, the resulting product was dissolved in methanol/THF (50/50) and  $\text{K}_2\text{CO}_3$  (1.78g, 12.9mmol) was added. After 1hour of stirring, water and diethyl ether were added. The organic phase was washed three times with water, dried over  $\text{MgSO}_4$  and concentrated under vacuum to provide the desired compound in quantitative yield that was used without further purification.

**CN-Ph-H** (3,13-dihydro-3,3,13-triphenyl-benzopyrano[5,6-a]carbazole)

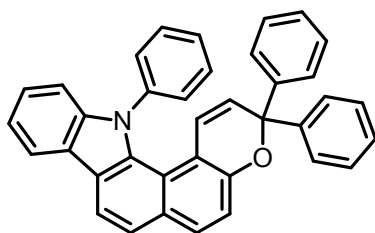

**Compound 3** (0.2g, 0.65mmol), 1,1-diphenylprop-2-yn-1-ol (0.148g, 0.71mmol) and 1,2-dichloroethane (15mL) were added to a monocol flask. Then, trimethyl orthoformate (0.274g, 2.58mmol) and PPTS (16mg, 0.065mmol) were added. The resulting mixture was heated at 80°C for 2hours, then left to return to room temperature diluted with dichloromethane and filtered through a plug of silica gel. After concentration of the filtrate under vacuum, the crude product was purified by column chromatography on silica gel (petroleum ether /CH<sub>2</sub>Cl<sub>2</sub> :80 / 20) to provide the desired product (0.15g, 33%). M.p. 196.2-197.5 °C; <sup>1</sup>H NMR (300 MHz, CDCl<sub>3</sub>) δ 8.17 – 8.12 (m, 1H), 8.04 (d, *J* = 8.3 Hz, 1H), 7.88 (d, *J* = 8.8 Hz, 1H), 7.68 (d, *J* = 8.4 Hz, 1H), 7.61 – 7.55 (m, 1H), 7.42 – 7.27 (m, 5H), 7.26 – 7.08 (m, 12H), 7.04 (d, *J* = 9.9 Hz, 1H), 5.49 (d, *J* = 9.9 Hz, 1H); <sup>13</sup>C NMR (75 MHz, CDCl<sub>3</sub>) δ 151.35, 144.90, 143.91, 142.35, 136.01, 131.34, 129.80, 129.62, 127.85, 127.25, 127.16, 126.52, 125.98, 125.62, 124.99, 124.49, 124.46, 123.33, 121.76, 121.41, 120.38, 119.75, 116.91, 116.61, 113.45, 111.78, 81.40; HRMS (ESI): *m/z* calcd for C<sub>37</sub>H<sub>26</sub>NO+H<sup>+</sup>: 500.2014 [*M*+H<sup>+</sup>]; found: 500.2025.

**CN-Ph-OMe** (3,13-dihydro 3-(4-methoxyphenyl)-3,13-diphenyl-benzopyrano[5,6-a]carbazole)

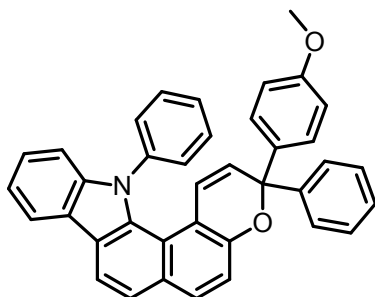

**Compound 3** (0.2g, 0.65mmol), **compound 6** (0.308g, 1.29mmol) and 1,2-dichloroethane (15mL) were added to a monocol flask. Then, trimethyl orthoformate (0.274g, 2.58mmol) and PPTS (16mg, 0.065mmol) were also added. The resulting mixture was heated at 80°C for 2 hours, then left to return to room temperature, diluted with dichloromethane and filtered through a plug of silica gel. After concentration of the filtrate under vacuum, the crude product was purified by column chromatography on silica gel (petroleum ether/CH<sub>2</sub>Cl<sub>2</sub> : 80/20) to provide the desired product (167mg, 52%). M.p. 144-146 °C; <sup>1</sup>H NMR (300 MHz, CDCl<sub>3</sub>) δ 8.18



– 8.11 (m, 1H), 8.04 (d,  $J = 8.3$  Hz, 1H), 7.87 (d,  $J = 8.8$  Hz, 1H), 7.67 (d,  $J = 8.4$  Hz, 1H), 7.58 (d,  $J = 7.2$  Hz, 1H), 7.43 – 7.16 (m, 13H), 7.15 – 7.08 (m, 4H), 7.03 (d,  $J = 9.8$  Hz, 1H), 6.80 (d,  $J = 8.8$  Hz, 2H), 5.46 (d,  $J = 9.9$  Hz, 1H), 3.79 (s, 3H);  $^{13}\text{C}$  NMR (75 MHz,  $\text{CDCl}_3$ )  $\delta$  158.86, 151.43, 145.21, 144.01, 142.47, 137.21, 136.11, 131.39, 129.86, 129.70, 128.76, 127.89, 127.21, 127.10, 126.57, 126.08, 125.69, 125.09, 124.54, 124.43, 123.43, 122.03, 121.49, 120.47, 119.83, 117.01, 116.65, 113.52, 113.24, 111.88, 81.31, 55.32; HRMS (ESI):  $m/z$  calcd for  $\text{C}_{38}\text{H}_{27}\text{NO}_2 + \text{H}^+$ : 530.2120 [ $M + \text{H}^+$ ]; found: 530.2155.

### CN-Ph-N(Me)<sub>2</sub>

(4-(3,13-diphenyl-3,13-dihydrochromeno[5,6-a]carbazol-3-yl)-N,N-dimethylaniline)

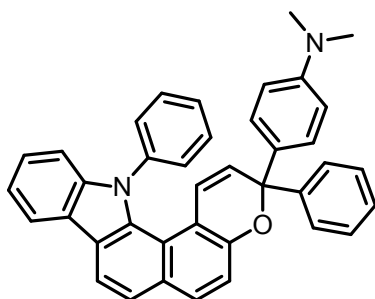

**Compound 3** (0.2g, 0.65mmol), **compound 7** (0.324g, 1.29mmol) and 1,2-dichloroethane (15mL) were added to a monocol flask. Then, trimethyl orthoformate (0.274g, 2.58mmol) and PPTS (16mg, 0.065mmol) were added. The resulting mixture was heated at 80°C for 2 hours, then left to return to room temperature diluted with dichloromethane and filtered through a plug of silica gel. After concentration of the filtrate under vacuum, the crude product was purified by column chromatography on silica gel ( $\text{CH}_2\text{Cl}_2$ ) to provide the desired product (70mg, 20%). M.p. 195-196 °C;  $^1\text{H}$  NMR (300 MHz,  $\text{CDCl}_3$ )  $\delta$  8.19 – 8.12 (m, 1H), 8.03 (d,  $J = 8.3$  Hz, 1H), 7.86 (d,  $J = 8.8$  Hz, 1H), 7.67 (d,  $J = 8.4$  Hz, 1H), 7.60 (dd,  $J = 6.9, 1.7$  Hz, 1H), 7.45 – 7.26 (m, 6H), 7.26 – 7.12 (m, 7H), 7.06 (d,  $J = 8.9$  Hz, 2H), 7.00 (d,  $J = 9.9$  Hz, 1H), 6.65 (d,  $J = 8.3$  Hz, 2H), 5.47 (d,  $J = 9.9$  Hz, 1H), 2.94 (s, 6H);  $^{13}\text{C}$  NMR (75 MHz,  $\text{CDCl}_3$ )  $\delta$  151.55, 145.30, 143.82, 142.31, 136.00, 131.14, 129.69, 129.55, 128.44, 127.68, 127.01, 126.90, 126.46, 125.94, 125.52, 125.00, 124.31, 124.08, 123.30, 122.17, 121.33, 120.38, 119.71, 117.00, 116.42, 113.42, 111.75, 81.44, 40.60; HRMS (ESI):  $m/z$  calcd for  $\text{C}_{39}\text{H}_{30}\text{N}_2\text{O} + \text{H}^+$ : 543.2436 [ $M + \text{H}^+$ ]; found: 543.2421.

### CN-Ph-N(Py)<sub>2</sub>

(N-(4-(3,13-diphenyl-3,13-dihydrochromeno[5,6-a]carbazol-3-yl)phenyl)-N-(pyridin-2-yl)pyridin-2-amine

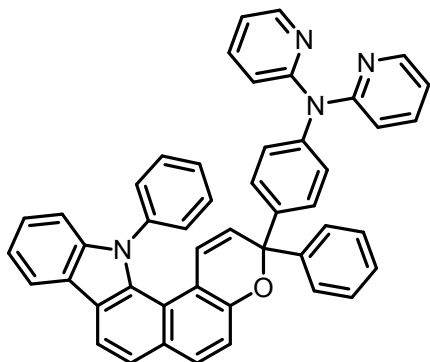

**Compound 3** (0.2g, 0.65mmol), **compound 8** (0.487g, 1.29mmol) and 1,2-dichloroethane (15mL) were added to a monocol flask. Then, trimethyl orthoformate (0.274g, 2.58mmol) and PPTS (30mg, 0.122mmol) were added. The resulting mixture was heated at 80°C for 2 hours, then left to return to room temperature diluted with dichloromethane and filtered through a plug of silica gel. After concentration of the filtrate under vacuum, the crude product was purified by column chromatography on silica gel (CH<sub>2</sub>Cl<sub>2</sub>/MeOH: 95/5) to provide the desired product (194mg, 45%). M.p. 184-186 °C; <sup>1</sup>H NMR (300 MHz, CDCl<sub>3</sub>) δ 8.30 (d, *J* = 4.4 Hz, 2H), 8.15 – 8.08 (m, 1H), 8.02 (d, *J* = 8.3 Hz, 1H), 7.85 (d, *J* = 8.8 Hz, 1H), 7.64 (d, *J* = 8.4 Hz, 1H), 7.53 (dd, *J* = 16.5, 7.9 Hz, 3H), 7.33 (dt, *J* = 12.6, 6.4 Hz, 3H), 7.24 – 7.14 (m, 7H), 7.06 (t, *J* = 9.5 Hz, 4H), 6.98 (d, *J* = 9.9 Hz, 1H), 6.91 (dd, *J* = 12.5, 7.6 Hz, 4H), 5.47 (d, *J* = 9.9 Hz, 1H); <sup>13</sup>C NMR (75 MHz, CDCl<sub>3</sub>) δ 157.85, 151.28, 148.34, 144.56, 143.81, 143.72, 142.23, 142.10, 137.70, 135.92, 131.35, 129.76, 129.68, 128.54, 127.84, 127.27, 127.13, 126.56, 126.08, 125.92, 125.61, 124.94, 124.44, 123.29, 121.60, 121.38, 120.33, 119.73, 118.30, 117.11, 116.86, 116.63, 113.37, 111.74, 81.19; HRMS (ESI): *m/z* calcd for C<sub>47</sub>H<sub>32</sub>N<sub>4</sub>O+H<sup>+</sup>: 669.2654[*M*+H<sup>+</sup>]; found: 669.2676.

### CN-Ph-N(Ph)<sub>2</sub>

(4-(3,13-diphenyl-3,13-dihydrochromeno[5,6-a]carbazol-3-yl)-N,N-diphenylaniline)

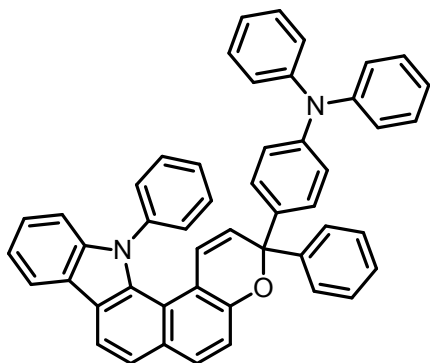

**Compound 3** (0.1g, 0.32mmol), **compound 9** (0.242g, 0.46mmol) and 1,2-dichloroethane (15mL) were added to a monocol flask. Then, trimethyl orthoformate (0.274g, 2.58mmol) and PPTS (15mg, 0.065mmol) were added. The resulting mixture was heated at 80°C for 2 hours, then left to return to room temperature diluted with dichloromethane and filtered through a plug of silica gel. After concentration of the filtrate under vacuum, the crude product was purified by column chromatography on silica gel (CH<sub>2</sub>Cl<sub>2</sub>) to provide the desired product (160mg, 74%). M.p. 185-187 °C; <sup>1</sup>H NMR (300 MHz, CDCl<sub>3</sub>) δ 8.17 – 8.12 (m, 1H), 8.04 (d, *J* = 8.3 Hz, 1H), 7.87 (d, *J* = 8.8 Hz, 1H), 7.67 (d, *J* = 8.4 Hz, 1H), 7.58 (dd, *J* = 6.8, 1.8 Hz, 1H), 7.42 – 7.27 (m, 5H), 7.25 – 6.91 (m, 23H), 5.47 (d, *J* = 9.9 Hz, 1H); <sup>13</sup>C NMR (75 MHz, CDCl<sub>3</sub>) δ 151.39, 147.60, 146.88, 144.84, 143.89, 142.34, 138.88, 136.00, 131.28, 129.77, 129.60, 129.19, 128.17, 127.79, 127.14, 127.06, 126.51, 125.99, 125.61, 124.99, 124.43, 124.32, 123.33, 122.91, 122.60, 121.91, 121.40, 120.39, 119.74, 116.95, 116.59, 113.45, 111.77, 81.27; HRMS (ESI): *m/z* calcd for C<sub>49</sub>H<sub>34</sub>N<sub>2</sub>O+H<sup>+</sup>: 667.2754[*M*+H<sup>+</sup>]; found: 667.2756.

## X-RAY STRUCTURE OF CN-Ph-H (CCDC = 1998515)

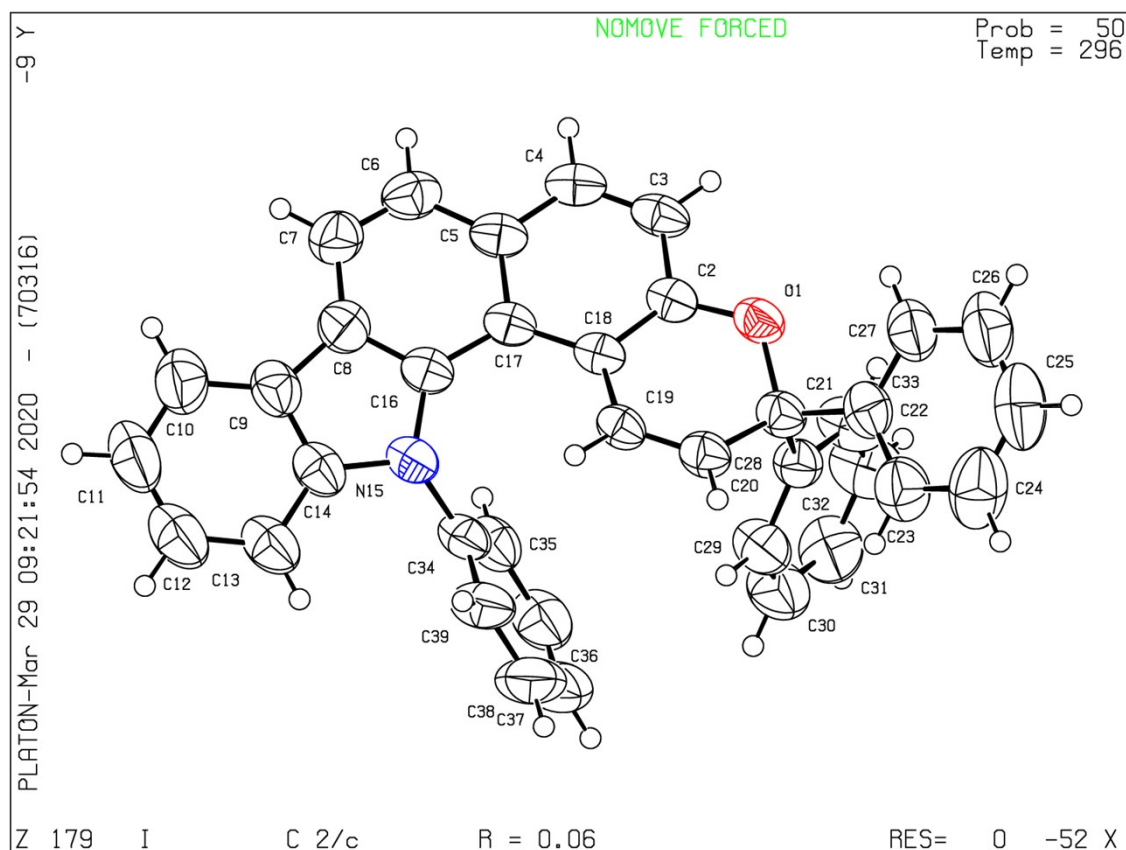

Crystal data for CN-Ph-H :  $C_{37}H_{25}NO$ ,  $M_w = 499.58$ , monoclinic, space group  $C2/c$ ; dimensions:  $a = 31.8763(12)$  Å,  $b = 6.7502(2)$  Å,  $c = 27.2595(10)$  Å,  $\beta = 114.087(2)^\circ$ ,  $V = 5354.7(3)$  Å<sup>3</sup>;  $Z = 8$ ;  $\mu = 0.07$  mm<sup>-1</sup>; 185603 reflections measured at room temperature; independent reflections: 4721 [4329  $F_o > 4\sigma(F_o)$ ]; data were collected up to a  $2\theta_{max}$  value of  $50.1^\circ$  (99.6 % coverage). Number of variables: 352;  $R_1 = 0.057$ ,  $wR_2 = 0.135$ ,  $S = 1.17$ ; highest residual electron density  $0.14$  e.Å<sup>-3</sup>; CCDC = 1998515.

## THEORETICAL CALCULATIONS

The computations were performed using the computer facilities at the Research Institute for Information Technology, Kyushu University. Molecular orbital calculations were performed using the program Gaussian 16.

The geometries were optimized at the CAM-B3LYP/6-31G(d,p) level and M06-2X/6-31G(d,p). The presence of energy minima for the geometry optimization was confirmed by the absence of imaginary modes (no imaginary frequencies). To numerically achieve accurate values, we have used tightened convergence thresholds for the self-consistent field ( $10^{-10}$  a.u.) and geometry optimization ( $10^{-5}$  a.u.) and a fine grid. The solvation effect in a solvent of toluene was considered by using the polarizable continuum model (PCM).

The time-dependent density functional theory (TD-DFT) calculations were conducted at the B3LYP/6-31G(d,p) level using the optimized structures at the CAM-B3LYP/6-31G(d,p).

Table S1. Gibbs free energies [kcal mol<sup>-1</sup>] calculated at the CAM-B3LYP/6-31G(d,p) level

|     | RN                                            | CN-Ph-H                                       |                              |
|-----|-----------------------------------------------|-----------------------------------------------|------------------------------|
| CF  | -651263.94                                    | -974957.75                                    |                              |
| TC  | -651255.54                                    | -974951.01                                    |                              |
| TT  | -651254.39                                    | -974949.47                                    |                              |
|     | CN-Ph-N(pyridyl) <sub>2</sub> -A <sup>a</sup> | CN-Ph-N(pyridyl) <sub>2</sub> -B <sup>a</sup> |                              |
| CF1 | -1319534.71                                   | -1319534.93                                   |                              |
| CF2 | -1319535.83                                   | -1319535.00                                   |                              |
| TTC | -1319528.39                                   | -1319528.76                                   |                              |
| CTC | -1319527.88                                   | -1319528.28                                   |                              |
| TTT | -1319527.10                                   | -1319526.87                                   |                              |
| CTT | -1319526.70                                   | -1319527.50                                   |                              |
|     | CN-Ph-N(phenyl) <sub>2</sub>                  | CN-Ph-OMe                                     | CN-Ph-N(methyl) <sub>2</sub> |
| CF1 | -1299385.76                                   | -1046777.23                                   | -1058939.92                  |
| CF2 | -1299385.31                                   | -1046777.23                                   | -1058940.05                  |
| TTC | -1299379.35                                   | -1046770.73                                   | -1058934.39                  |
| CTC | -1299378.82                                   | -1046770.05                                   | -1058934.55                  |
| TTT | -1299377.58                                   | -1046768.97                                   | -1058932.97                  |
| CTT | -1299377.68                                   | -1046769.23                                   | -1058932.75                  |

<sup>a</sup>Different conformation for the 2-pyridyl moiety.

Table S2. Gibbs free energies [kcal mol<sup>-1</sup>] calculated at the M06-2X/6-31G(d,p) level

|     | RN                                            | CN-Ph-H                                       |                              |
|-----|-----------------------------------------------|-----------------------------------------------|------------------------------|
| CF  | -651361.60                                    | -975112.99                                    |                              |
| TC  | -651350.20                                    | -975103.32                                    |                              |
| TT  | -651349.40                                    | -975102.37                                    |                              |
|     | CN-Ph-N(pyridyl) <sub>2</sub> -A <sup>a</sup> | CN-Ph-N(pyridyl) <sub>2</sub> -B <sup>a</sup> |                              |
| CF1 | -1319738.93                                   | -1319736.56                                   |                              |
| CF2 | -1319738.05                                   | -1319737.53                                   |                              |
| TTC | -1319727.64                                   | -1319727.81                                   |                              |
| CTC | -1319729.60                                   | -1319728.70                                   |                              |
| TTT | -1319727.26                                   | -1319727.14                                   |                              |
| CTT | -1319726.62                                   | -1319727.49                                   |                              |
|     | CN-Ph-N(phenyl) <sub>2</sub>                  | CN-Ph-OMe                                     | CN-Ph-N(methyl) <sub>2</sub> |
| CF1 | -1299592.44                                   | -1046932.31                                   | -1059101.39                  |
| CF2 | -1299593.05                                   | -1046932.28                                   | -1059101.08                  |
| TTC | -1299583.38                                   | -1046922.90                                   | -1059093.15                  |
| CTC | -1299583.28                                   | -1046923.15                                   | -1059094.11                  |
| TTT | -1299582.45                                   | -1046922.37                                   | -1059092.15                  |
| CTT | -1299582.52                                   | -1046922.13                                   | -1059092.34                  |

<sup>a</sup>Different conformation for the 2-pyridyl moiety.

Table S3. Dipole moment [debye] calculated at the CAM-B3LYP/6-31G(d,p) level

|     | RN                            |                              | CN-Ph-H   |                              |
|-----|-------------------------------|------------------------------|-----------|------------------------------|
| CF  | 0.88                          |                              | 2.01      |                              |
| TC  | 3.85                          |                              | 3.55      |                              |
| TT  | 4.13                          |                              | 3.73      |                              |
|     | CN-Ph-N(pyridyl) <sub>2</sub> | CN-Ph-N(phenyl) <sub>2</sub> | CN-Ph-OMe | CN-Ph-N(methyl) <sub>2</sub> |
| CF1 | 2.72–3.82                     | 2.17                         | 2.37      | 4.30                         |
| CF2 | 2.49–3.26                     | 2.00                         | 0.82      | 3.14                         |
| TTC | 1.63–5.44                     | 3.53                         | 4.63      | 4.90                         |
| CTC | 4.08–5.78                     | 3.96                         | 5.12      | 6.87                         |
| TTT | 4.41–5.14                     | 4.75                         | 5.11      | 7.30                         |
| CTT | 2.06–5.06                     | 3.35                         | 4.17      | 3.80                         |

|     | RN                                                                                  | CN-Ph-H                                                                               |
|-----|-------------------------------------------------------------------------------------|---------------------------------------------------------------------------------------|
| CF  | 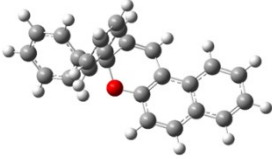   |     |
| TC  |    |     |
| TT  |    |     |
|     | CN-Ph-N(pyridyl) <sub>2</sub> -A <sup>a</sup>                                       | CN-Ph-N(pyridyl) <sub>2</sub> -B <sup>a</sup>                                         |
| CF1 |  |  |
| CF2 |  |   |
| TTC |  |   |
| CTC |  |  |

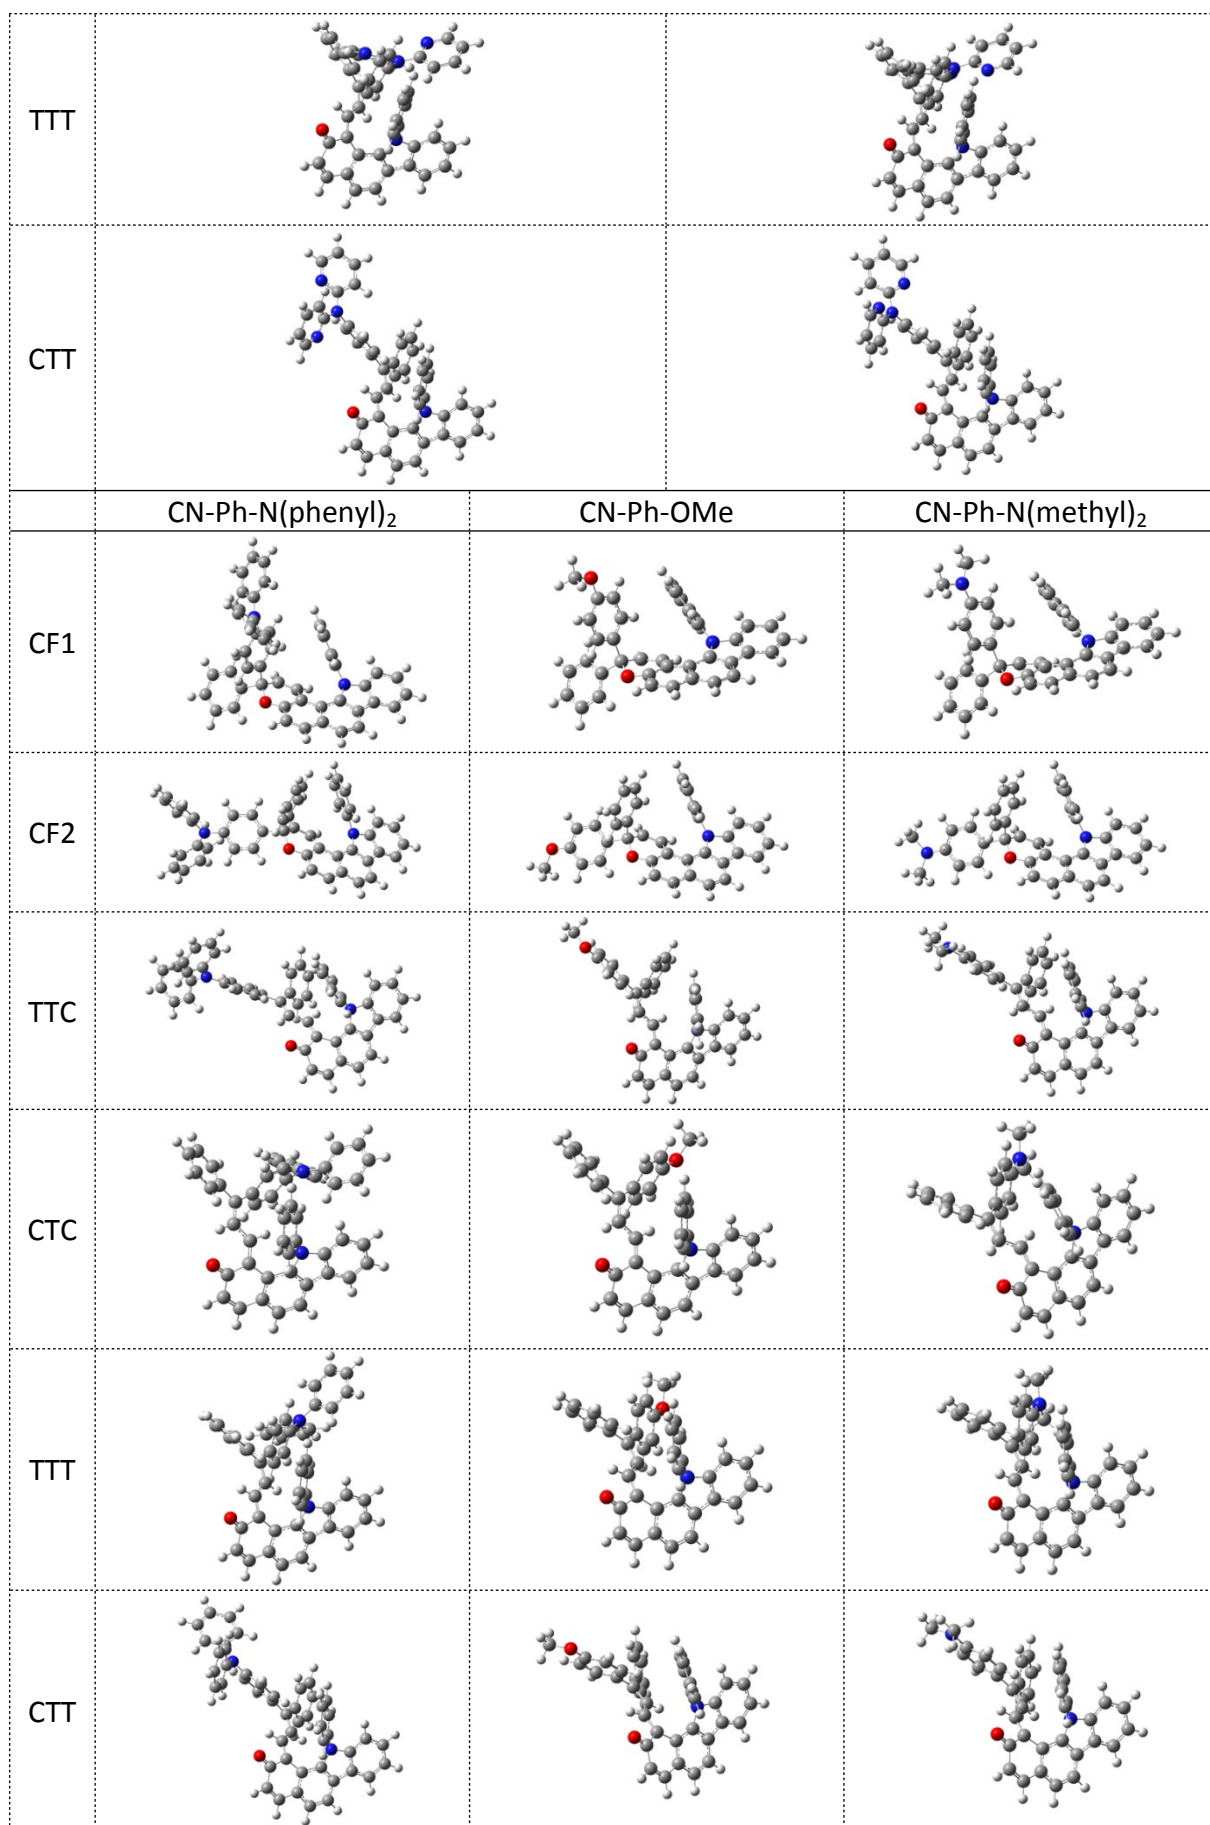



Figure S1. Optimized geometry at the CAM-B3LYP/6-31G(d,p)

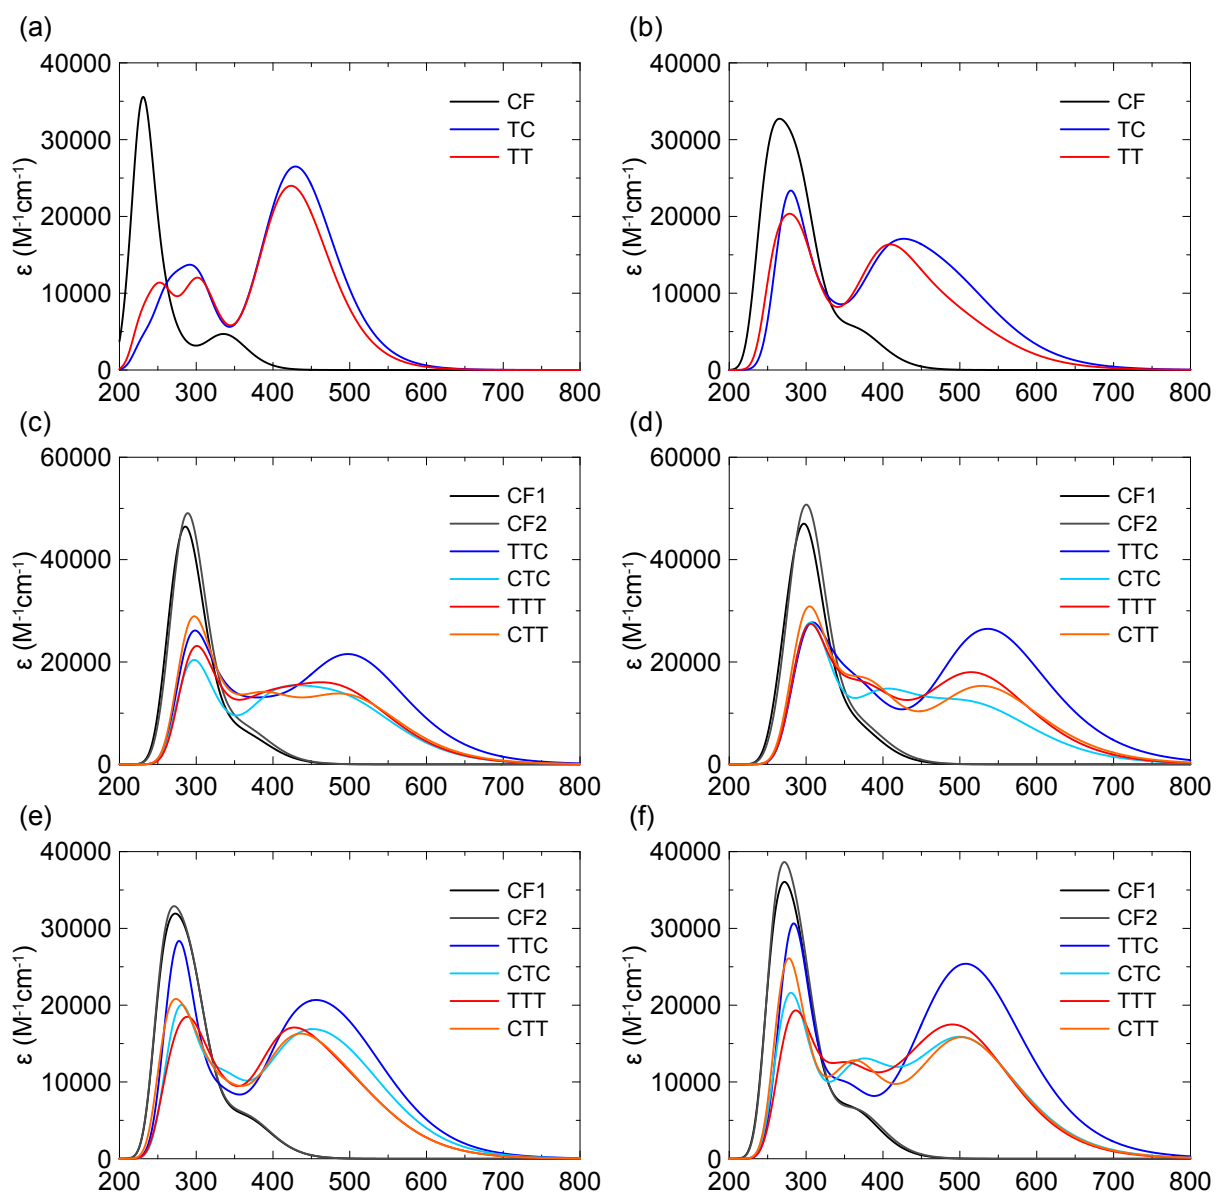

Figure S2. Calculated absorption spectra at the B3LYP/6-31G(d,p) level for (a) RN, (b) CN-Ph-H, (c) CN-Ph-N(pyridyl)<sub>2</sub>, (d) CN-Ph-N(phenyl)<sub>2</sub>, (e) CN-Ph-OMe, and (f) CN-Ph-N(methyl)<sub>2</sub>.

Table S4. Calculated vertical excitation energies (VEE), wavelength, and oscillator strength ( $f$ ) of the singlet excited states for RN at the B3LYP/6-31G(d,p) level

| $S_n$ | CF     |        |        | TC      |        |        | TT      |        |        |
|-------|--------|--------|--------|---------|--------|--------|---------|--------|--------|
|       | VEE    | [eV]   | [nm]   | $f$ [-] | [eV]   | [nm]   | $f$ [-] | [eV]   | [nm]   |
| 1     | 3.6650 | 338.15 | 0.1109 | 2.6358  | 470.38 | 0.0264 | 2.7314  | 453.93 | 0.0953 |
| 2     | 4.2550 | 291.39 | 0.0368 | 2.8610  | 433.36 | 0.5802 | 2.9396  | 421.78 | 0.4969 |
| 3     | 4.5171 | 274.48 | 0.0092 | 3.2309  | 383.75 | 0.1229 | 3.3315  | 372.16 | 0.0576 |
| 4     | 4.6146 | 268.68 | 0.0285 | 3.8421  | 322.70 | 0.0045 | 3.8691  | 320.45 | 0.0110 |
| 5     | 4.6463 | 266.85 | 0.0041 | 3.9012  | 317.81 | 0.0076 | 3.9922  | 310.57 | 0.0217 |
| 6     | 4.6692 | 265.53 | 0.0068 | 3.9678  | 312.48 | 0.0395 | 4.0368  | 307.14 | 0.0634 |
| 7     | 4.8952 | 253.28 | 0.0990 | 4.0925  | 302.96 | 0.0196 | 4.0905  | 303.10 | 0.1471 |
| 8     | 4.9205 | 251.97 | 0.0426 | 4.1202  | 300.92 | 0.2058 | 4.1445  | 299.15 | 0.0393 |
| 9     | 4.9611 | 249.91 | 0.0072 | 4.4257  | 280.14 | 0.0085 | 4.4828  | 276.58 | 0.0084 |
| 10    | 4.9829 | 248.82 | 0.0389 | 4.5341  | 273.45 | 0.1109 | 4.6139  | 268.72 | 0.0294 |
| 11    | 5.0401 | 246.00 | 0.0018 | 4.5656  | 271.56 | 0.0222 | 4.6171  | 268.53 | 0.0164 |
| 12    | 5.0843 | 243.86 | 0.0051 | 4.7659  | 260.15 | 0.0856 | 4.7298  | 262.13 | 0.0577 |
| 13    | 5.3345 | 232.42 | 0.6198 | 4.8664  | 254.77 | 0.0480 | 4.8189  | 257.29 | 0.0407 |
| 14    | 5.4045 | 229.41 | 0.0062 | 4.9186  | 252.07 | 0.0056 | 4.9421  | 250.88 | 0.0530 |
| 15    | 5.4836 | 226.10 | 0.0016 | 4.9877  | 248.58 | 0.0039 | 5.0122  | 247.37 | 0.0752 |
| 16    | 5.5637 | 222.84 | 0.1990 | 5.1179  | 242.26 | 0.0228 | 5.1544  | 240.54 | 0.0200 |
| 17    | 5.6090 | 221.04 | 0.0084 | 5.2397  | 236.62 | 0.0053 | 5.2392  | 236.65 | 0.0115 |
| 18    | 5.6892 | 217.93 | 0.0021 | 5.3233  | 232.91 | 0.0144 | 5.2970  | 234.06 | 0.0022 |
| 19    | 5.7518 | 215.56 | 0.0286 | 5.3755  | 230.65 | 0.0266 | 5.3758  | 230.64 | 0.0131 |
| 20    | 5.7956 | 213.93 | 0.0090 | 5.3920  | 229.94 | 0.0052 | 5.4107  | 229.15 | 0.0109 |
| 21    | 5.8832 | 210.74 | 0.0772 | 5.4455  | 227.68 | 0.0017 | 5.4438  | 227.75 | 0.0151 |
| 22    | 5.9197 | 209.44 | 0.0087 | 5.4640  | 226.91 | 0.0007 | 5.4776  | 226.35 | 0.0520 |
| 23    | 5.9657 | 207.83 | 0.0115 | 5.4884  | 225.90 | 0.0147 | 5.4981  | 225.51 | 0.0248 |
| 24    | 5.9871 | 207.09 | 0.0032 | 5.5090  | 225.06 | 0.0095 | 5.5402  | 223.79 | 0.0069 |

Table S5. Calculated vertical excitation energies (VEE), wavelength, and oscillator strength ( $f$ ) of the singlet excited states for CN-Ph-H at the B3LYP/6-31G(d,p) level

| $S_n$ | CF     |        |        | TC      |        |        | TT      |        |        |
|-------|--------|--------|--------|---------|--------|--------|---------|--------|--------|
|       | VEE    | [eV]   | [nm]   | $f$ [-] | [eV]   | [nm]   | $f$ [-] | [eV]   | [nm]   |
| 1     | 3.3652 | 368.43 | 0.1150 | 2.4545  | 505.14 | 0.1928 | 2.4731  | 501.33 | 0.1312 |
| 2     | 3.7589 | 329.84 | 0.0224 | 2.7813  | 445.77 | 0.1171 | 2.8542  | 434.40 | 0.0930 |
| 3     | 3.9572 | 313.31 | 0.0241 | 2.8450  | 435.80 | 0.0589 | 3.0039  | 412.74 | 0.0430 |
| 4     | 4.0779 | 304.04 | 0.0748 | 3.0983  | 400.17 | 0.2541 | 3.0988  | 400.11 | 0.2608 |
| 5     | 4.1209 | 300.87 | 0.0753 | 3.6950  | 335.54 | 0.1224 | 3.6018  | 344.23 | 0.0933 |
| 6     | 4.2703 | 290.34 | 0.3286 | 3.9108  | 317.03 | 0.0049 | 3.9267  | 315.75 | 0.0071 |
| 7     | 4.4349 | 279.56 | 0.0017 | 3.9302  | 315.47 | 0.0145 | 3.9780  | 311.67 | 0.0045 |
| 8     | 4.4653 | 277.66 | 0.0141 | 3.9444  | 314.33 | 0.0079 | 4.0563  | 305.66 | 0.0207 |
| 9     | 4.5357 | 273.35 | 0.1344 | 4.0233  | 308.16 | 0.0081 | 4.0731  | 304.40 | 0.0128 |
| 10    | 4.5887 | 270.19 | 0.0027 | 4.0558  | 305.70 | 0.0202 | 4.1062  | 301.94 | 0.1115 |
| 11    | 4.6185 | 268.45 | 0.1146 | 4.1566  | 298.28 | 0.0331 | 4.1748  | 296.99 | 0.0068 |
| 12    | 4.6749 | 265.21 | 0.0379 | 4.1992  | 295.26 | 0.0137 | 4.1864  | 296.16 | 0.0067 |
| 13    | 4.7571 | 260.63 | 0.0015 | 4.2145  | 294.18 | 0.0449 | 4.1965  | 295.45 | 0.0224 |
| 14    | 4.7858 | 259.07 | 0.0467 | 4.2260  | 293.39 | 0.0236 | 4.2645  | 290.74 | 0.0059 |
| 15    | 4.8278 | 256.81 | 0.1549 | 4.2836  | 289.44 | 0.0018 | 4.3121  | 287.52 | 0.1497 |
| 16    | 4.8465 | 255.82 | 0.0510 | 4.3524  | 284.86 | 0.0386 | 4.3539  | 284.77 | 0.0172 |
| 17    | 4.8521 | 255.53 | 0.0010 | 4.3747  | 283.41 | 0.0391 | 4.4131  | 280.94 | 0.0159 |
| 18    | 4.9034 | 252.85 | 0.1173 | 4.3962  | 282.02 | 0.0342 | 4.4920  | 276.01 | 0.0599 |
| 19    | 4.9094 | 252.55 | 0.0179 | 4.4595  | 278.02 | 0.1475 | 4.4940  | 275.89 | 0.0151 |
| 20    | 4.9629 | 249.82 | 0.0192 | 4.5279  | 273.82 | 0.1842 | 4.5514  | 272.41 | 0.0199 |
| 21    | 5.0035 | 247.80 | 0.0026 | 4.6923  | 264.23 | 0.0388 | 4.7216  | 262.59 | 0.0605 |
| 22    | 5.0366 | 246.17 | 0.0222 | 4.7699  | 259.93 | 0.0200 | 4.7422  | 261.45 | 0.0415 |
| 23    | 5.0750 | 244.3  | 0.0076 | 4.7923  | 258.72 | 0.0120 | 4.8112  | 257.70 | 0.1796 |
| 24    | 5.1784 | 239.43 | 0.2021 | 4.8129  | 257.61 | 0.0046 | 4.8410  | 256.11 | 0.0118 |

Table S6. Calculated vertical excitation energies (VEE), wavelength, and oscillator strength ( $f$ ) of the singlet excited states for CN-Ph-N(pyridyl)<sub>2</sub> at the B3LYP/6-31G(d,p) level

| $S_n$ | CF1-A  |        |         | TTC-A   |        |         | TTT-A   |        |         |
|-------|--------|--------|---------|---------|--------|---------|---------|--------|---------|
|       | VEE    | [eV]   | [nm]    | $f$ [-] | [eV]   | [nm]    | $f$ [-] | [eV]   | [nm]    |
| 1     | 3.3074 | 374.87 | 0.1158  | 2.3954  | 517.60 | 0.4164  | 2.4426  | 507.59 | 0.2455  |
| 2     | 3.7102 | 334.17 | 0.0151  | 2.6501  | 467.85 | 0.1377  | 2.7132  | 456.97 | 0.1110  |
| 3     | 3.8435 | 322.58 | 0.0190  | 2.8257  | 438.77 | 0.0121  | 2.8967  | 428.01 | 0.0785  |
| 4     | 3.8864 | 319.02 | 0.0146  | 2.8441  | 435.94 | 0.0579  | 3.0119  | 411.64 | 0.0447  |
| 5     | 3.9478 | 314.06 | 0.0059  | 3.1983  | 387.66 | 0.1909  | 3.2069  | 386.62 | 0.1773  |
| 6     | 4.0128 | 308.97 | 0.0775  | 3.6206  | 342.44 | 0.1930  | 3.5428  | 349.96 | 0.1015  |
| 7     | 4.0218 | 308.28 | 0.0981  | 3.8636  | 320.90 | 0.0265  | 3.8745  | 320.00 | 0.1229  |
| 8     | 4.0424 | 306.71 | 0.0290  | 3.9309  | 315.41 | 0.0412  | 3.8914  | 318.61 | 0.0113  |
| 9     | 4.1649 | 297.69 | 0.0188  | 3.9349  | 315.09 | 0.0051  | 3.9140  | 316.77 | 0.0063  |
| 10    | 4.2049 | 294.86 | 0.1662  | 3.9530  | 313.65 | 0.0020  | 3.9887  | 310.84 | 0.0016  |
| 11    | 4.2605 | 291.01 | 0.1014  | 4.0200  | 308.42 | 0.0605  | 4.0741  | 304.32 | 0.0081  |
| 12    | 4.2620 | 290.90 | 0.1839  | 4.0409  | 306.82 | 0.0208  | 4.0873  | 303.34 | 0.0419  |
| 13    | 4.3244 | 286.71 | 0.0256  | 4.0476  | 306.32 | 0.0067  | 4.0990  | 302.47 | 0.0501  |
| 14    | 4.3497 | 285.04 | 0.1797  | 4.1057  | 301.98 | 0.0315  | 4.1019  | 302.26 | 0.0221  |
| 15    | 4.3583 | 284.48 | 0.0469  | 4.1308  | 300.15 | 0.1014  | 4.1557  | 298.35 | 0.1158  |
| 16    | 4.4069 | 281.34 | 0.0294  | 4.1475  | 298.94 | 0.0010  | 4.1701  | 297.31 | 0.0591  |
| 17    | 4.5058 | 275.17 | 0.0238  | 4.1778  | 296.77 | 0.1189  | 4.2077  | 294.66 | 0.0343  |
| 18    | 4.5370 | 273.27 | 0.0703  | 4.1874  | 296.09 | 0.0254  | 4.2473  | 291.92 | 0.0136  |
| 19    | 4.5478 | 272.63 | 0.0568  | 4.2010  | 295.13 | 0.0071  | 4.2705  | 290.33 | 0.0094  |
| 20    | 4.5877 | 270.25 | 0.0128  | 4.2636  | 290.80 | 0.0021  | 4.3015  | 288.24 | 0.0489  |
| 21    | 4.6305 | 267.76 | 0.0704  | 4.2719  | 290.23 | 0.0362  | 4.3088  | 287.74 | 0.0495  |
| 22    | 4.6470 | 266.81 | 0.0467  | 4.2868  | 289.22 | 0.0083  | 4.3333  | 286.12 | 0.0150  |
| 23    | 4.6833 | 264.74 | 0.0014  | 4.3207  | 286.95 | 0.0153  | 4.3643  | 284.08 | 0.0082  |
| 24    | 4.7049 | 263.52 | 0.0159  | 4.3331  | 286.13 | 0.1352  | 4.3833  | 282.86 | 0.0228  |
| $S_n$ | CF1-B  |        |         | TTC-B   |        |         | TTT-B   |        |         |
| VEE   | [eV]   | [nm]   | $f$ [-] | [eV]    | [nm]   | $f$ [-] | [eV]    | [nm]   | $f$ [-] |
| 1     | 3.3627 | 368.70 | 0.1132  | 2.3917  | 518.39 | 0.3962  | 2.4224  | 511.82 | 0.2331  |
| 2     | 3.6968 | 335.38 | 0.0366  | 2.6511  | 467.67 | 0.1345  | 2.7221  | 455.47 | 0.1346  |
| 3     | 3.7646 | 329.34 | 0.0125  | 2.8146  | 440.50 | 0.0189  | 2.8677  | 432.34 | 0.0935  |
| 4     | 3.9493 | 313.94 | 0.0196  | 2.8361  | 437.16 | 0.0516  | 2.9886  | 414.86 | 0.0334  |
| 5     | 4.0304 | 307.62 | 0.0694  | 3.1792  | 389.99 | 0.2036  | 3.2263  | 384.29 | 0.1782  |
| 6     | 4.0388 | 306.98 | 0.0299  | 3.6301  | 341.54 | 0.1885  | 3.5322  | 351.02 | 0.1009  |
| 7     | 4.0915 | 303.03 | 0.0495  | 3.8807  | 319.49 | 0.0084  | 3.8636  | 320.90 | 0.0515  |
| 8     | 4.1202 | 300.92 | 0.0842  | 3.9173  | 316.50 | 0.0330  | 3.9005  | 317.87 | 0.0761  |
| 9     | 4.2489 | 291.80 | 0.2735  | 3.9253  | 315.86 | 0.0090  | 3.9518  | 313.74 | 0.0021  |
| 10    | 4.2859 | 289.29 | 0.1005  | 3.9728  | 312.08 | 0.0015  | 3.9717  | 312.17 | 0.0010  |
| 11    | 4.3128 | 287.48 | 0.1499  | 4.0001  | 309.95 | 0.0443  | 4.0451  | 306.51 | 0.0331  |
| 12    | 4.3212 | 286.92 | 0.1288  | 4.0282  | 307.79 | 0.0127  | 4.0582  | 305.51 | 0.0167  |
| 13    | 4.3346 | 286.03 | 0.0127  | 4.0339  | 307.35 | 0.0519  | 4.0755  | 304.22 | 0.0963  |
| 14    | 4.4515 | 278.52 | 0.0027  | 4.1215  | 300.82 | 0.0418  | 4.1134  | 301.41 | 0.0839  |
| 15    | 4.4609 | 277.93 | 0.0217  | 4.1231  | 300.71 | 0.0113  | 4.1332  | 299.97 | 0.0280  |
| 16    | 4.5362 | 273.32 | 0.0549  | 4.1564  | 298.30 | 0.0818  | 4.1858  | 296.20 | 0.0772  |
| 17    | 4.5456 | 272.76 | 0.1013  | 4.1882  | 296.03 | 0.0259  | 4.2075  | 294.67 | 0.0118  |
| 18    | 4.5587 | 271.97 | 0.0790  | 4.1941  | 295.61 | 0.0844  | 4.2305  | 293.07 | 0.0096  |
| 19    | 4.5877 | 270.25 | 0.0006  | 4.1979  | 295.35 | 0.0164  | 4.2412  | 292.33 | 0.0120  |
| 20    | 4.6030 | 269.35 | 0.0391  | 4.2547  | 291.41 | 0.0089  | 4.2775  | 289.85 | 0.0638  |
| 21    | 4.6224 | 268.22 | 0.0658  | 4.2795  | 289.72 | 0.0271  | 4.3042  | 288.06 | 0.0305  |
| 22    | 4.6402 | 267.20 | 0.0821  | 4.3048  | 288.02 | 0.0452  | 4.3334  | 286.12 | 0.0102  |

|       |        |        |        |        |        |        |        |        |        |
|-------|--------|--------|--------|--------|--------|--------|--------|--------|--------|
| 23    | 4.6651 | 265.77 | 0.0171 | 4.3299 | 286.34 | 0.0563 | 4.3766 | 283.29 | 0.0236 |
| 24    | 4.6958 | 264.03 | 0.0264 | 4.3388 | 285.76 | 0.1230 | 4.3835 | 282.84 | 0.0099 |
| $S_n$ | CF2-A  |        |        | CTC-A  |        |        | CTT-A  |        |        |
| VEE   | [eV]   | [nm]   | $f[-]$ | [eV]   | [nm]   | $f[-]$ | [eV]   | [nm]   | $f[-]$ |
| 1     | 3.3606 | 368.94 | 0.1397 | 2.4056 | 515.39 | 0.2041 | 2.4402 | 508.08 | 0.2206 |
| 2     | 3.6996 | 335.13 | 0.0321 | 2.7051 | 458.33 | 0.0809 | 2.6507 | 467.74 | 0.0870 |
| 3     | 3.7597 | 329.77 | 0.0184 | 2.8132 | 440.72 | 0.1095 | 2.8742 | 431.36 | 0.0458 |
| 4     | 3.9524 | 313.70 | 0.0288 | 2.8389 | 436.74 | 0.0139 | 3.0020 | 413.01 | 0.0352 |
| 5     | 3.9993 | 310.01 | 0.0702 | 3.1530 | 393.22 | 0.2336 | 3.1770 | 390.26 | 0.2194 |
| 6     | 4.0791 | 303.95 | 0.0881 | 3.6287 | 341.68 | 0.0432 | 3.5568 | 348.59 | 0.1261 |
| 7     | 4.1219 | 300.79 | 0.1077 | 3.8177 | 324.76 | 0.0298 | 3.8408 | 322.81 | 0.0785 |
| 8     | 4.1632 | 297.81 | 0.0029 | 3.8250 | 324.14 | 0.0036 | 3.9099 | 317.10 | 0.0078 |
| 9     | 4.2657 | 290.65 | 0.2189 | 3.8711 | 320.28 | 0.0024 | 3.9409 | 314.61 | 0.0123 |
| 10    | 4.2697 | 290.38 | 0.1916 | 3.9306 | 315.43 | 0.0416 | 3.9806 | 311.47 | 0.0125 |
| 11    | 4.2825 | 289.52 | 0.2978 | 3.9749 | 311.92 | 0.0090 | 4.0338 | 307.36 | 0.0121 |
| 12    | 4.3448 | 285.36 | 0.0248 | 3.9772 | 311.74 | 0.0642 | 4.0768 | 304.12 | 0.0324 |
| 13    | 4.3829 | 282.88 | 0.0215 | 4.0375 | 307.09 | 0.0585 | 4.0947 | 302.79 | 0.0841 |
| 14    | 4.4405 | 279.21 | 0.0476 | 4.0579 | 305.53 | 0.0475 | 4.1301 | 300.20 | 0.0065 |
| 15    | 4.4635 | 277.77 | 0.0006 | 4.1025 | 302.22 | 0.0248 | 4.1604 | 298.01 | 0.0293 |
| 16    | 4.5139 | 274.67 | 0.0787 | 4.1142 | 301.36 | 0.0305 | 4.2049 | 294.86 | 0.0568 |
| 17    | 4.5378 | 273.23 | 0.0604 | 4.1453 | 299.1  | 0.1016 | 4.2189 | 293.88 | 0.0246 |
| 18    | 4.5504 | 272.47 | 0.0505 | 4.1626 | 297.86 | 0.0306 | 4.2416 | 292.31 | 0.1107 |
| 19    | 4.5912 | 270.05 | 0.0003 | 4.2500 | 291.72 | 0.0822 | 4.2606 | 291.00 | 0.0118 |
| 20    | 4.6108 | 268.90 | 0.0648 | 4.2762 | 289.94 | 0.0375 | 4.2697 | 290.38 | 0.0000 |
| 21    | 4.6178 | 268.49 | 0.0235 | 4.2857 | 289.30 | 0.0778 | 4.2985 | 288.44 | 0.0548 |
| 22    | 4.6739 | 265.27 | 0.0127 | 4.3071 | 287.86 | 0.0229 | 4.3207 | 286.96 | 0.0913 |
| 23    | 4.6892 | 264.40 | 0.0134 | 4.3333 | 286.12 | 0.0019 | 4.3355 | 285.97 | 0.0873 |
| 24    | 4.7546 | 260.76 | 0.0305 | 4.3610 | 284.30 | 0.0080 | 4.3411 | 285.61 | 0.0430 |
| $S_n$ | CF2-B  |        |        | CTC-B  |        |        | CTT-B  |        |        |
| VEE   | [eV]   | [nm]   | $f[-]$ | [eV]   | [nm]   | $f[-]$ | [eV]   | [nm]   | $f[-]$ |
| 1     | 3.3586 | 369.15 | 0.1380 | 2.4423 | 507.65 | 0.2375 | 2.4216 | 511.99 | 0.2456 |
| 2     | 3.6903 | 335.97 | 0.0252 | 2.6485 | 468.12 | 0.0186 | 2.6214 | 472.97 | 0.0682 |
| 3     | 3.7592 | 329.81 | 0.0216 | 2.8183 | 439.93 | 0.0727 | 2.8684 | 432.24 | 0.0495 |
| 4     | 3.9472 | 314.11 | 0.0282 | 2.8831 | 430.03 | 0.0859 | 3.0067 | 412.36 | 0.0301 |
| 5     | 4.0032 | 309.72 | 0.0628 | 3.1490 | 393.73 | 0.2161 | 3.1718 | 390.89 | 0.2188 |
| 6     | 4.0741 | 304.32 | 0.0843 | 3.6482 | 339.85 | 0.0721 | 3.5478 | 349.47 | 0.1277 |
| 7     | 4.1243 | 300.62 | 0.1108 | 3.8744 | 320.01 | 0.0034 | 3.8266 | 324.00 | 0.0725 |
| 8     | 4.1666 | 297.57 | 0.0011 | 3.9105 | 317.05 | 0.0652 | 3.8831 | 319.29 | 0.0021 |
| 9     | 4.2567 | 291.27 | 0.2639 | 3.9337 | 315.19 | 0.0122 | 3.9492 | 313.95 | 0.0587 |
| 10    | 4.2731 | 290.15 | 0.1771 | 3.9617 | 312.96 | 0.0530 | 3.9819 | 311.37 | 0.0038 |
| 11    | 4.2842 | 289.40 | 0.2728 | 3.9922 | 310.56 | 0.0116 | 4.0342 | 307.33 | 0.0060 |
| 12    | 4.3599 | 284.38 | 0.0553 | 3.9999 | 309.97 | 0.0046 | 4.0575 | 305.57 | 0.0079 |
| 13    | 4.4023 | 281.64 | 0.0069 | 4.0348 | 307.29 | 0.0197 | 4.0926 | 302.95 | 0.0994 |
| 14    | 4.4551 | 278.30 | 0.0092 | 4.1055 | 301.99 | 0.0077 | 4.1247 | 300.59 | 0.0166 |
| 15    | 4.4716 | 277.27 | 0.0271 | 4.1460 | 299.04 | 0.0577 | 4.1388 | 299.57 | 0.0522 |
| 16    | 4.5098 | 274.92 | 0.0893 | 4.1680 | 297.46 | 0.0076 | 4.1561 | 298.32 | 0.0760 |
| 17    | 4.5382 | 273.20 | 0.1128 | 4.1907 | 295.85 | 0.0125 | 4.1963 | 295.46 | 0.0641 |
| 18    | 4.5672 | 271.46 | 0.0026 | 4.2296 | 293.14 | 0.0123 | 4.2133 | 294.27 | 0.0632 |
| 19    | 4.5878 | 270.25 | 0.0012 | 4.2403 | 292.39 | 0.0388 | 4.2593 | 291.09 | 0.0109 |
| 20    | 4.6118 | 268.84 | 0.0634 | 4.2555 | 291.35 | 0.0188 | 4.2891 | 289.07 | 0.0251 |
| 21    | 4.6195 | 268.39 | 0.0288 | 4.2833 | 289.46 | 0.0818 | 4.3095 | 287.70 | 0.1263 |
| 22    | 4.6745 | 265.23 | 0.0118 | 4.3078 | 287.81 | 0.0136 | 4.3253 | 286.65 | 0.0072 |
| 23    | 4.6897 | 264.37 | 0.0027 | 4.3110 | 287.60 | 0.0675 | 4.3418 | 285.56 | 0.0567 |
| 24    | 4.7428 | 261.42 | 0.0045 | 4.3474 | 285.19 | 0.0801 | 4.3603 | 284.35 | 0.0538 |

Table S7. Calculated vertical excitation energies (VEE), wavelength, and oscillator strength ( $f$ ) of the singlet excited states for CN-Ph-N(phenyl)<sub>2</sub> at the B3LYP/6-31G(d,p) level

| S <sub>n</sub> | CF1    |        |         | TTC    |        |         | TTT    |        |         |
|----------------|--------|--------|---------|--------|--------|---------|--------|--------|---------|
| VEE            | [eV]   | [nm]   | $f$ [-] | [eV]   | [nm]   | $f$ [-] | [eV]   | [nm]   | $f$ [-] |
| 1              | 3.3516 | 369.92 | 0.0268  | 2.2873 | 542.05 | 0.6160  | 2.3576 | 525.89 | 0.3949  |
| 2              | 3.3676 | 368.17 | 0.1287  | 2.5873 | 479.20 | 0.0416  | 2.6173 | 473.72 | 0.0424  |
| 3              | 3.7608 | 329.68 | 0.0199  | 2.8234 | 439.13 | 0.0163  | 2.8989 | 427.70 | 0.0763  |
| 4              | 3.9042 | 317.57 | 0.0187  | 2.8529 | 434.60 | 0.0634  | 3.0155 | 411.16 | 0.0481  |
| 5              | 3.9491 | 313.95 | 0.0186  | 3.2374 | 382.97 | 0.1724  | 3.2521 | 381.24 | 0.1675  |
| 6              | 3.9879 | 310.90 | 0.3169  | 3.5149 | 352.74 | 0.2273  | 3.4366 | 360.77 | 0.1449  |
| 7              | 4.0709 | 304.56 | 0.0442  | 3.7931 | 326.86 | 0.0085  | 3.7753 | 328.41 | 0.1064  |
| 8              | 4.1063 | 301.93 | 0.0632  | 3.9081 | 317.25 | 0.0667  | 3.8134 | 325.13 | 0.0214  |
| 9              | 4.1146 | 301.33 | 0.1228  | 3.9505 | 313.85 | 0.0262  | 3.9652 | 312.68 | 0.0023  |
| 10             | 4.1197 | 300.95 | 0.0951  | 3.9610 | 313.01 | 0.0029  | 3.9971 | 310.18 | 0.0221  |
| 11             | 4.1441 | 299.18 | 0.0961  | 3.9854 | 311.09 | 0.1415  | 4.0270 | 307.89 | 0.1239  |
| 12             | 4.2357 | 292.71 | 0.0993  | 4.0070 | 309.42 | 0.0309  | 4.0292 | 307.71 | 0.0452  |
| 13             | 4.2599 | 291.05 | 0.0413  | 4.0134 | 308.93 | 0.1447  | 4.0937 | 302.87 | 0.0053  |
| 14             | 4.2774 | 289.86 | 0.0893  | 4.0361 | 307.19 | 0.0134  | 4.0974 | 302.59 | 0.2335  |
| 15             | 4.3113 | 287.58 | 0.1169  | 4.0658 | 304.95 | 0.0031  | 4.1229 | 300.72 | 0.0138  |
| 16             | 4.4387 | 279.33 | 0.0179  | 4.1093 | 301.72 | 0.0360  | 4.1440 | 299.19 | 0.0104  |
| 17             | 4.4636 | 277.77 | 0.0182  | 4.1358 | 299.78 | 0.0168  | 4.1961 | 295.48 | 0.0447  |
| 18             | 4.4847 | 276.46 | 0.0341  | 4.1685 | 297.43 | 0.0219  | 4.2080 | 294.64 | 0.0324  |
| 19             | 4.5264 | 273.91 | 0.1228  | 4.1789 | 296.69 | 0.0082  | 4.2523 | 291.57 | 0.0153  |
| 20             | 4.5490 | 272.55 | 0.0016  | 4.2145 | 294.19 | 0.0420  | 4.2911 | 288.94 | 0.0056  |
| 21             | 4.5924 | 269.98 | 0.0031  | 4.2220 | 293.66 | 0.0026  | 4.3160 | 287.27 | 0.0106  |
| 22             | 4.6186 | 268.45 | 0.1099  | 4.2881 | 289.14 | 0.1403  | 4.3304 | 286.31 | 0.0108  |
| 23             | 4.6659 | 265.72 | 0.0156  | 4.3447 | 285.37 | 0.0099  | 4.3469 | 285.22 | 0.0484  |
| 24             | 4.7426 | 261.43 | 0.0053  | 4.3860 | 282.68 | 0.0020  | 4.3898 | 282.44 | 0.0090  |
| S <sub>n</sub> | CF2    |        |         | CTC    |        |         | CTT    |        |         |
| VEE            | [eV]   | [nm]   | $f$ [-] | [eV]   | [nm]   | $f$ [-] | [eV]   | [nm]   | $f$ [-] |
| 1              | 3.3042 | 375.24 | 0.1261  | 2.3087 | 537.02 | 0.2109  | 2.3121 | 536.25 | 0.3499  |
| 2              | 3.3981 | 364.87 | 0.0438  | 2.5301 | 490.04 | 0.0561  | 2.5550 | 485.25 | 0.0248  |
| 3              | 3.7575 | 329.97 | 0.0334  | 2.8064 | 441.79 | 0.0749  | 2.8843 | 429.86 | 0.0493  |
| 4              | 3.8934 | 318.44 | 0.0083  | 2.8678 | 432.33 | 0.0809  | 3.0132 | 411.46 | 0.0354  |
| 5              | 3.9380 | 314.84 | 0.1017  | 3.1694 | 391.20 | 0.2367  | 3.2068 | 386.63 | 0.2081  |
| 6              | 4.0238 | 308.13 | 0.4689  | 3.5600 | 348.27 | 0.0503  | 3.4400 | 360.41 | 0.1629  |
| 7              | 4.0616 | 305.26 | 0.0313  | 3.8186 | 324.69 | 0.1114  | 3.7267 | 332.69 | 0.0505  |
| 8              | 4.1035 | 302.14 | 0.0413  | 3.8534 | 321.75 | 0.0148  | 3.8399 | 322.89 | 0.0126  |
| 9              | 4.1131 | 301.44 | 0.2242  | 3.9316 | 315.35 | 0.0989  | 3.9578 | 313.27 | 0.0553  |
| 10             | 4.1348 | 299.86 | 0.0127  | 3.9507 | 313.83 | 0.0339  | 4.0020 | 309.80 | 0.1726  |
| 11             | 4.1798 | 296.63 | 0.0305  | 3.9662 | 312.60 | 0.0697  | 4.0288 | 307.74 | 0.0365  |
| 12             | 4.2598 | 291.06 | 0.2061  | 3.9786 | 311.63 | 0.0030  | 4.0505 | 306.09 | 0.0498  |
| 13             | 4.2835 | 289.45 | 0.0595  | 4.0369 | 307.13 | 0.0096  | 4.0833 | 303.64 | 0.1116  |
| 14             | 4.3318 | 286.22 | 0.0069  | 4.0773 | 304.08 | 0.0429  | 4.0913 | 303.04 | 0.0232  |
| 15             | 4.3588 | 284.45 | 0.0553  | 4.0891 | 303.21 | 0.0049  | 4.1115 | 301.55 | 0.0465  |
| 16             | 4.4260 | 280.12 | 0.0393  | 4.1373 | 299.68 | 0.1869  | 4.1269 | 300.43 | 0.0731  |
| 17             | 4.4311 | 279.81 | 0.0384  | 4.1569 | 298.26 | 0.0010  | 4.1567 | 298.28 | 0.0253  |
| 18             | 4.4803 | 276.73 | 0.0395  | 4.1936 | 295.65 | 0.0176  | 4.1994 | 295.25 | 0.0242  |

|    |        |        |        |        |        |        |        |        |        |
|----|--------|--------|--------|--------|--------|--------|--------|--------|--------|
| 19 | 4.5009 | 275.47 | 0.0087 | 4.2213 | 293.71 | 0.0296 | 4.2162 | 294.07 | 0.0039 |
| 20 | 4.5791 | 270.76 | 0.0056 | 4.2339 | 292.84 | 0.0716 | 4.2764 | 289.92 | 0.0305 |
| 21 | 4.5855 | 270.38 | 0.0080 | 4.2649 | 290.71 | 0.0041 | 4.2874 | 289.18 | 0.0033 |
| 22 | 4.6079 | 269.07 | 0.0570 | 4.2798 | 289.70 | 0.0058 | 4.3351 | 286.00 | 0.1036 |
| 23 | 4.6375 | 267.35 | 0.0269 | 4.3197 | 287.02 | 0.0468 | 4.3492 | 285.07 | 0.0072 |
| 24 | 4.7034 | 263.61 | 0.0193 | 4.3320 | 286.20 | 0.0270 | 4.3555 | 284.66 | 0.0169 |

Table S8. Calculated vertical excitation energies (VEE), wavelength, and oscillator strength ( $f$ ) of the singlet excited states for CN-Ph-OMe at the B3LYP/6-31G(d,p) level

| $S_n$ | CF1    |        |        | TTC    |        |        | TTT    |        |        |
|-------|--------|--------|--------|--------|--------|--------|--------|--------|--------|
| VEE   | [eV]   | [nm]   | $f[-]$ | [eV]   | [nm]   | $f[-]$ | [eV]   | [nm]   | $f[-]$ |
| 1     | 3.3650 | 368.45 | 0.1155 | 2.4462 | 506.85 | 0.2879 | 2.4769 | 500.56 | 0.1856 |
| 2     | 3.7605 | 329.70 | 0.0234 | 2.7680 | 447.92 | 0.1647 | 2.8541 | 434.41 | 0.1323 |
| 3     | 3.9602 | 313.08 | 0.0237 | 2.8661 | 432.59 | 0.0690 | 3.0180 | 410.82 | 0.2123 |
| 4     | 4.0793 | 303.94 | 0.0074 | 3.0155 | 411.15 | 0.1847 | 3.0314 | 409.01 | 0.0335 |
| 5     | 4.0901 | 303.13 | 0.0820 | 3.6554 | 339.18 | 0.1173 | 3.5809 | 346.24 | 0.0996 |
| 6     | 4.1505 | 298.72 | 0.1677 | 3.6972 | 335.34 | 0.0509 | 3.7859 | 327.49 | 0.0828 |
| 7     | 4.2986 | 288.43 | 0.2360 | 3.9719 | 312.15 | 0.0045 | 4.0159 | 308.73 | 0.0093 |
| 8     | 4.4036 | 281.55 | 0.0008 | 4.0025 | 309.77 | 0.0076 | 4.0250 | 308.04 | 0.0034 |
| 9     | 4.5245 | 274.03 | 0.1667 | 4.0506 | 306.09 | 0.0077 | 4.0897 | 303.16 | 0.0265 |
| 10    | 4.5952 | 269.81 | 0.0050 | 4.0837 | 303.61 | 0.0051 | 4.1167 | 301.17 | 0.0610 |
| 11    | 4.6204 | 268.34 | 0.0857 | 4.1195 | 300.97 | 0.0137 | 4.1215 | 300.82 | 0.0324 |
| 12    | 4.6724 | 265.36 | 0.0477 | 4.1754 | 296.94 | 0.0259 | 4.1741 | 297.03 | 0.0113 |
| 13    | 4.7626 | 260.33 | 0.0047 | 4.2054 | 294.82 | 0.0153 | 4.2130 | 294.29 | 0.0520 |
| 14    | 4.7770 | 259.54 | 0.0025 | 4.2216 | 293.69 | 0.0035 | 4.2526 | 291.55 | 0.0635 |
| 15    | 4.8052 | 258.02 | 0.0191 | 4.2333 | 292.88 | 0.0246 | 4.2673 | 290.55 | 0.0343 |
| 16    | 4.8135 | 257.57 | 0.2110 | 4.2856 | 289.31 | 0.0306 | 4.3331 | 286.13 | 0.0065 |
| 17    | 4.8309 | 256.65 | 0.0729 | 4.2938 | 288.75 | 0.0207 | 4.3870 | 282.62 | 0.0188 |
| 18    | 4.8884 | 253.63 | 0.0004 | 4.3437 | 285.43 | 0.0510 | 4.3953 | 282.08 | 0.0274 |
| 19    | 4.9199 | 252.01 | 0.0279 | 4.4268 | 280.08 | 0.1580 | 4.4505 | 278.59 | 0.0460 |
| 20    | 4.9316 | 251.41 | 0.0267 | 4.5176 | 274.45 | 0.3036 | 4.5633 | 271.70 | 0.0484 |
| 21    | 4.9427 | 250.84 | 0.0267 | 4.6342 | 267.54 | 0.0140 | 4.6648 | 265.78 | 0.0199 |
| 22    | 4.9502 | 250.46 | 0.0249 | 4.6764 | 265.13 | 0.0568 | 4.7058 | 263.47 | 0.0727 |
| 23    | 5.0038 | 247.78 | 0.0001 | 4.7204 | 262.66 | 0.0083 | 4.7210 | 262.62 | 0.0468 |
| 24    | 5.0142 | 247.27 | 0.0040 | 4.7699 | 259.93 | 0.0602 | 4.7375 | 261.71 | 0.0156 |
| $S_n$ | CF2    |        |        | CTC    |        |        | CTT    |        |        |
| VEE   | [eV]   | [nm]   | $f[-]$ | [eV]   | [nm]   | $f[-]$ | [eV]   | [nm]   | $f[-]$ |
| 1     | 3.3669 | 368.25 | 0.1199 | 2.4539 | 505.26 | 0.2333 | 2.4713 | 501.69 | 0.1754 |
| 2     | 3.7614 | 329.62 | 0.0227 | 2.7725 | 447.20 | 0.1218 | 2.8364 | 437.11 | 0.1617 |
| 3     | 3.9519 | 313.73 | 0.0236 | 2.8592 | 433.63 | 0.0628 | 2.9894 | 414.74 | 0.1589 |
| 4     | 4.0644 | 305.05 | 0.1171 | 3.0301 | 409.17 | 0.1641 | 3.0195 | 410.62 | 0.0277 |
| 5     | 4.0840 | 303.59 | 0.0071 | 3.5764 | 346.68 | 0.0858 | 3.5787 | 346.45 | 0.0843 |
| 6     | 4.1617 | 297.92 | 0.0385 | 3.6788 | 337.02 | 0.1323 | 3.6201 | 342.48 | 0.0910 |
| 7     | 4.2713 | 290.28 | 0.3506 | 3.9557 | 313.44 | 0.0206 | 4.0129 | 308.96 | 0.0134 |
| 8     | 4.4472 | 278.79 | 0.0115 | 3.9855 | 311.09 | 0.0042 | 4.0418 | 306.76 | 0.0203 |
| 9     | 4.4627 | 277.82 | 0.0202 | 3.9946 | 310.38 | 0.0129 | 4.0903 | 303.12 | 0.0568 |
| 10    | 4.5799 | 270.71 | 0.0441 | 4.0841 | 303.58 | 0.0057 | 4.1160 | 301.22 | 0.0448 |
| 11    | 4.5978 | 269.66 | 0.0287 | 4.1226 | 300.74 | 0.0389 | 4.1233 | 300.69 | 0.0217 |
| 12    | 4.6737 | 265.28 | 0.3059 | 4.1979 | 295.35 | 0.0098 | 4.1664 | 297.58 | 0.0160 |
| 13    | 4.7547 | 260.76 | 0.0006 | 4.2121 | 294.36 | 0.0032 | 4.1901 | 295.90 | 0.0142 |
| 14    | 4.7755 | 259.63 | 0.0140 | 4.2298 | 293.12 | 0.0403 | 4.2666 | 290.59 | 0.0251 |
| 15    | 4.8110 | 257.71 | 0.0149 | 4.2580 | 291.18 | 0.0008 | 4.2850 | 289.34 | 0.0904 |
| 16    | 4.8236 | 257.04 | 0.1089 | 4.3144 | 287.38 | 0.0242 | 4.3379 | 285.82 | 0.0123 |



|    |        |        |        |        |        |        |        |        |        |
|----|--------|--------|--------|--------|--------|--------|--------|--------|--------|
| 17 | 4.8470 | 255.79 | 0.0545 | 4.3563 | 284.61 | 0.0929 | 4.3885 | 282.52 | 0.0071 |
| 18 | 4.8916 | 253.46 | 0.0122 | 4.3711 | 283.65 | 0.0899 | 4.4077 | 281.29 | 0.0169 |
| 19 | 4.9066 | 252.69 | 0.0322 | 4.4820 | 276.63 | 0.0367 | 4.4824 | 276.60 | 0.0414 |
| 20 | 4.9429 | 250.83 | 0.0393 | 4.5682 | 271.41 | 0.1482 | 4.6283 | 267.88 | 0.1018 |
| 21 | 4.9604 | 249.95 | 0.0132 | 4.6753 | 265.19 | 0.0355 | 4.6800 | 264.93 | 0.0038 |
| 22 | 4.9673 | 249.60 | 0.0114 | 4.7113 | 263.16 | 0.0141 | 4.7201 | 262.67 | 0.0525 |
| 23 | 5.0208 | 246.94 | 0.0170 | 4.7546 | 260.77 | 0.0067 | 4.7270 | 262.29 | 0.0952 |
| 24 | 5.0268 | 246.65 | 0.0047 | 4.7949 | 258.57 | 0.0218 | 4.7646 | 260.22 | 0.1208 |

Table S9. Calculated vertical excitation energies (VEE), wavelength, and oscillator strength ( $f$ ) of the singlet excited states for CN-Ph- N(methyl)<sub>2</sub> at the B3LYP/6-31G(d,p) level

| S <sub>n</sub> | CF1    |        |         | TTC    |        |         | TTT    |        |         |
|----------------|--------|--------|---------|--------|--------|---------|--------|--------|---------|
| VEE            | [eV]   | [nm]   | $f$ [-] | [eV]   | [nm]   | $f$ [-] | [eV]   | [nm]   | $f$ [-] |
| 1              | 3.3625 | 368.73 | 0.1029  | 2.3727 | 522.55 | 0.5216  | 2.4243 | 511.42 | 0.3378  |
| 2              | 3.4918 | 355.08 | 0.0424  | 2.6938 | 460.26 | 0.1432  | 2.7380 | 452.82 | 0.1088  |
| 3              | 3.7726 | 328.64 | 0.0137  | 2.8808 | 430.38 | 0.0595  | 2.9683 | 417.70 | 0.0803  |
| 4              | 3.9240 | 315.96 | 0.0218  | 2.9169 | 425.05 | 0.0262  | 3.0471 | 406.89 | 0.0471  |
| 5              | 4.0539 | 305.84 | 0.0333  | 3.4472 | 359.67 | 0.0734  | 3.4667 | 357.64 | 0.0610  |
| 6              | 4.1370 | 299.69 | 0.1311  | 3.5442 | 349.82 | 0.1405  | 3.5013 | 354.11 | 0.1811  |
| 7              | 4.1879 | 296.06 | 0.0112  | 3.9144 | 316.74 | 0.0082  | 3.9298 | 315.49 | 0.0807  |
| 8              | 4.2255 | 293.42 | 0.0157  | 3.9872 | 310.95 | 0.0008  | 4.0017 | 309.83 | 0.0086  |
| 9              | 4.2821 | 289.54 | 0.2691  | 4.0168 | 308.67 | 0.0120  | 4.0161 | 308.72 | 0.0008  |
| 10             | 4.3457 | 285.31 | 0.0185  | 4.0376 | 307.08 | 0.0140  | 4.0560 | 305.68 | 0.0074  |
| 11             | 4.4888 | 276.21 | 0.0313  | 4.0771 | 304.10 | 0.0150  | 4.1179 | 301.09 | 0.0058  |
| 12             | 4.5222 | 274.17 | 0.1642  | 4.0822 | 303.72 | 0.0062  | 4.1330 | 299.99 | 0.0143  |
| 13             | 4.5607 | 271.85 | 0.0344  | 4.1214 | 300.83 | 0.0407  | 4.1599 | 298.05 | 0.0073  |
| 14             | 4.5845 | 270.44 | 0.0022  | 4.1352 | 299.83 | 0.0109  | 4.1961 | 295.47 | 0.0900  |
| 15             | 4.6164 | 268.58 | 0.0781  | 4.1483 | 298.88 | 0.0196  | 4.2234 | 293.56 | 0.0272  |
| 16             | 4.6661 | 265.71 | 0.0321  | 4.2427 | 292.23 | 0.0379  | 4.2817 | 289.57 | 0.0897  |
| 17             | 4.7393 | 261.61 | 0.0924  | 4.2608 | 290.99 | 0.0104  | 4.3145 | 287.36 | 0.0126  |
| 18             | 4.7496 | 261.04 | 0.0105  | 4.2636 | 290.80 | 0.0531  | 4.3475 | 285.18 | 0.0153  |
| 19             | 4.7623 | 260.34 | 0.0150  | 4.3759 | 283.34 | 0.3269  | 4.3983 | 281.89 | 0.0140  |
| 20             | 4.7945 | 258.60 | 0.0364  | 4.4416 | 279.14 | 0.1848  | 4.4517 | 278.51 | 0.0697  |
| 21             | 4.8249 | 256.97 | 0.1348  | 4.4851 | 276.44 | 0.0193  | 4.5200 | 274.30 | 0.0305  |
| 22             | 4.8402 | 256.16 | 0.0623  | 4.5514 | 272.41 | 0.0072  | 4.5503 | 272.47 | 0.0027  |
| 23             | 4.8710 | 254.54 | 0.0896  | 4.6154 | 268.63 | 0.0638  | 4.5787 | 270.79 | 0.0642  |
| 24             | 4.8846 | 253.83 | 0.0281  | 4.6415 | 267.12 | 0.0167  | 4.6303 | 267.77 | 0.0774  |
| S <sub>n</sub> | CF2    |        |         | CTC    |        |         | CTT    |        |         |
| VEE            | [eV]   | [nm]   | $f$ [-] | [eV]   | [nm]   | $f$ [-] | [eV]   | [nm]   | $f$ [-] |
| 1              | 3.3543 | 369.63 | 0.1361  | 2.4005 | 516.49 | 0.3288  | 2.4089 | 514.69 | 0.3278  |
| 2              | 3.4936 | 354.89 | 0.0066  | 2.6788 | 462.84 | 0.0453  | 2.6642 | 465.37 | 0.0704  |
| 3              | 3.7696 | 328.90 | 0.0149  | 2.8590 | 433.66 | 0.0057  | 2.9356 | 422.35 | 0.0306  |
| 4              | 3.9353 | 315.06 | 0.0246  | 2.9079 | 426.37 | 0.1122  | 3.0374 | 408.19 | 0.0433  |
| 5              | 4.0522 | 305.96 | 0.0439  | 3.3152 | 373.98 | 0.2165  | 3.3466 | 370.48 | 0.1438  |
| 6              | 4.1325 | 300.02 | 0.1082  | 3.5934 | 345.03 | 0.0883  | 3.5002 | 354.22 | 0.1359  |
| 7              | 4.2236 | 293.55 | 0.0168  | 3.9521 | 313.71 | 0.0186  | 3.8711 | 320.28 | 0.0481  |
| 8              | 4.2691 | 290.42 | 0.3262  | 3.9967 | 310.22 | 0.0012  | 3.9611 | 313.00 | 0.0033  |
| 9              | 4.2974 | 288.51 | 0.0252  | 4.0165 | 308.69 | 0.0131  | 4.0200 | 308.42 | 0.0173  |
| 10             | 4.3953 | 282.08 | 0.0027  | 4.0477 | 306.30 | 0.0244  | 4.0822 | 303.72 | 0.0053  |
| 11             | 4.4330 | 279.68 | 0.0270  | 4.0775 | 304.07 | 0.0033  | 4.1229 | 300.72 | 0.0290  |
| 12             | 4.4794 | 276.79 | 0.0131  | 4.0923 | 302.97 | 0.0445  | 4.1446 | 299.15 | 0.0077  |
| 13             | 4.5552 | 272.18 | 0.0449  | 4.1407 | 299.43 | 0.0115  | 4.1710 | 297.26 | 0.0153  |
| 14             | 4.5827 | 270.55 | 0.0503  | 4.1857 | 296.21 | 0.0093  | 4.2014 | 295.10 | 0.0610  |

|    |        |        |        |        |        |        |        |        |        |
|----|--------|--------|--------|--------|--------|--------|--------|--------|--------|
| 15 | 4.5956 | 269.79 | 0.0056 | 4.1975 | 295.38 | 0.0163 | 4.2622 | 290.89 | 0.0156 |
| 16 | 4.6060 | 269.18 | 0.0296 | 4.2632 | 290.82 | 0.0445 | 4.2726 | 290.18 | 0.0135 |
| 17 | 4.6774 | 265.07 | 0.3991 | 4.2884 | 289.11 | 0.0203 | 4.3042 | 288.06 | 0.0126 |
| 18 | 4.7573 | 260.62 | 0.0039 | 4.3431 | 285.48 | 0.1128 | 4.3706 | 283.68 | 0.0170 |
| 19 | 4.7906 | 258.81 | 0.0185 | 4.4265 | 280.09 | 0.0399 | 4.4231 | 280.31 | 0.0232 |
| 20 | 4.7991 | 258.35 | 0.0359 | 4.5052 | 275.2  | 0.0605 | 4.4652 | 277.67 | 0.0818 |
| 21 | 4.8217 | 257.14 | 0.0408 | 4.5718 | 271.19 | 0.0492 | 4.4784 | 276.85 | 0.0379 |
| 22 | 4.8444 | 255.93 | 0.0422 | 4.5883 | 270.22 | 0.1099 | 4.5534 | 272.29 | 0.3042 |
| 23 | 4.8701 | 254.58 | 0.0765 | 4.6176 | 268.50 | 0.0641 | 4.5845 | 270.44 | 0.0869 |
| 24 | 4.9044 | 252.80 | 0.0435 | 4.6733 | 265.30 | 0.0218 | 4.6087 | 269.02 | 0.0036 |

# RMN SPECTRA

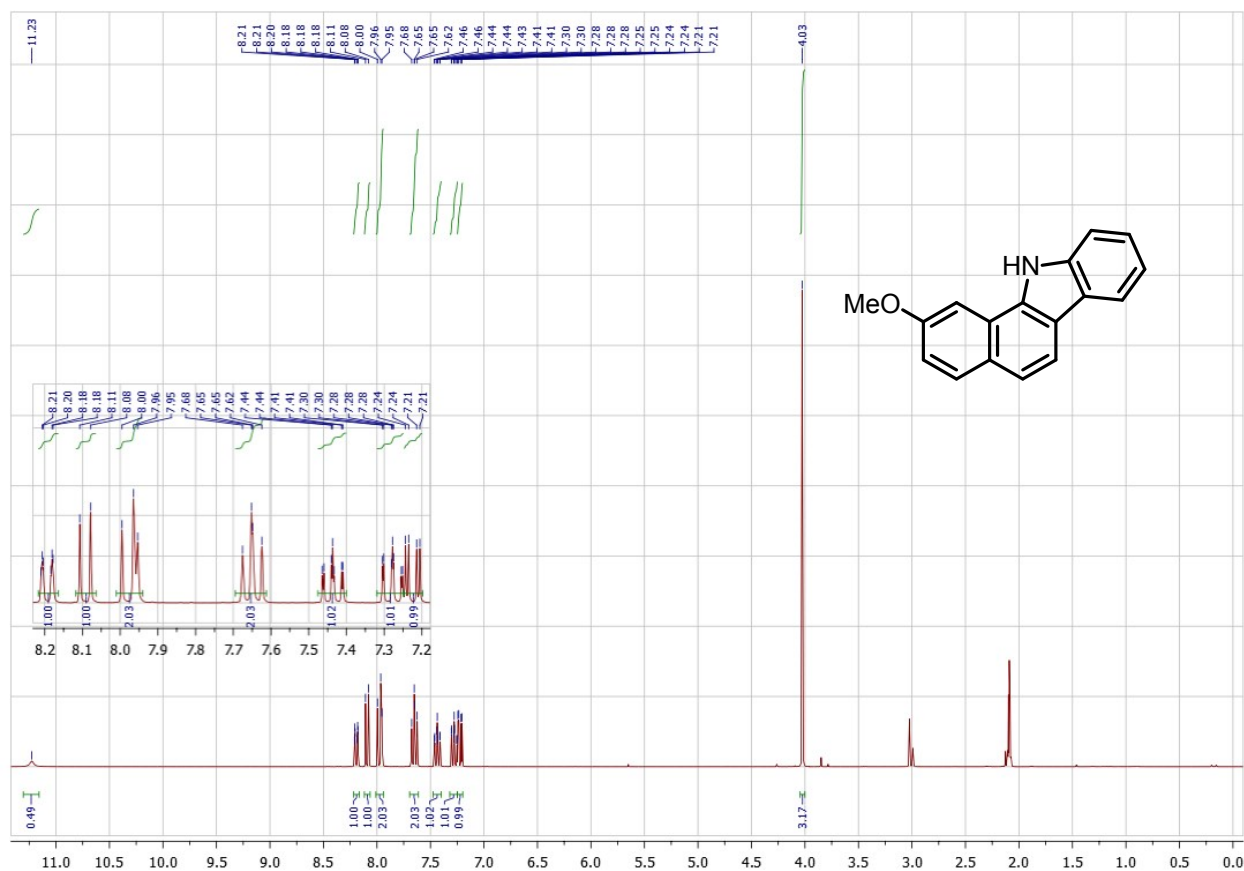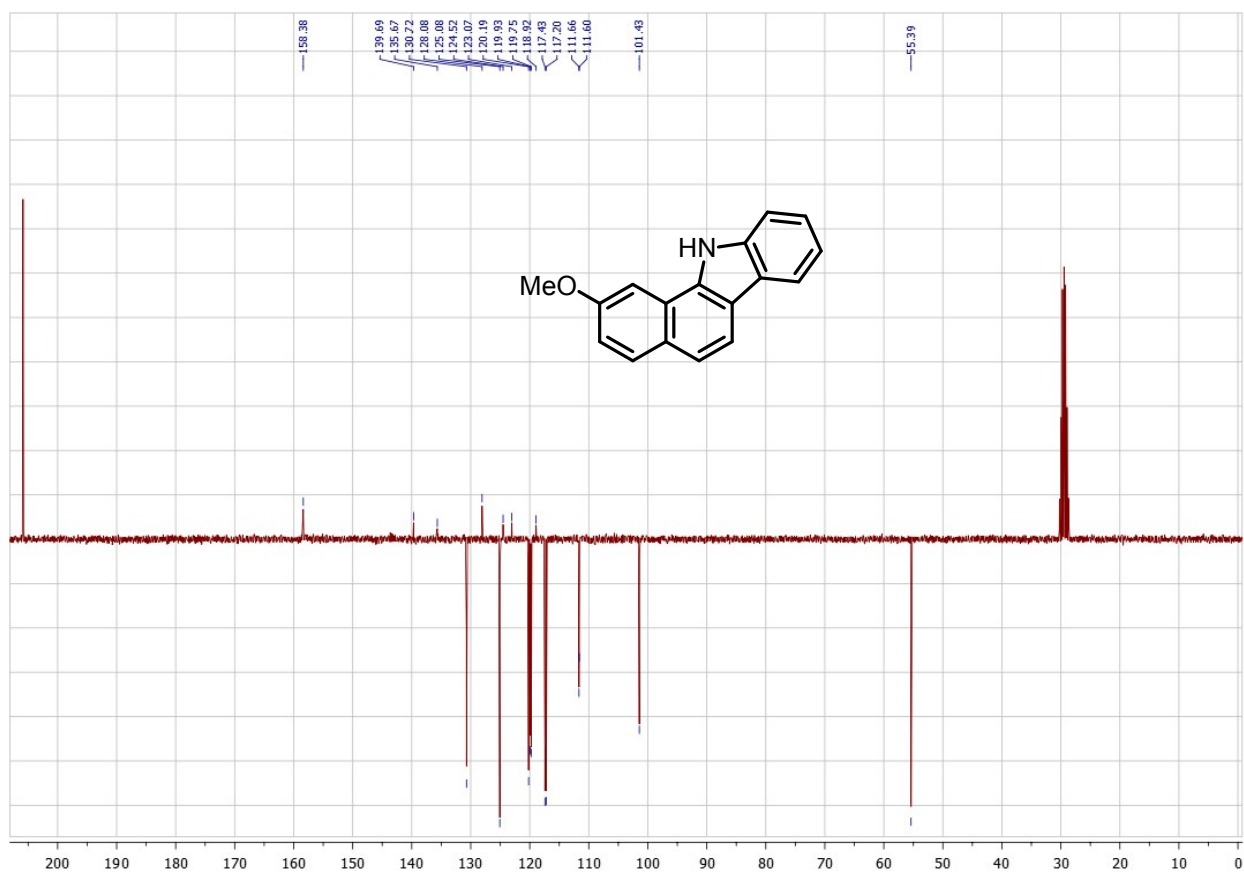

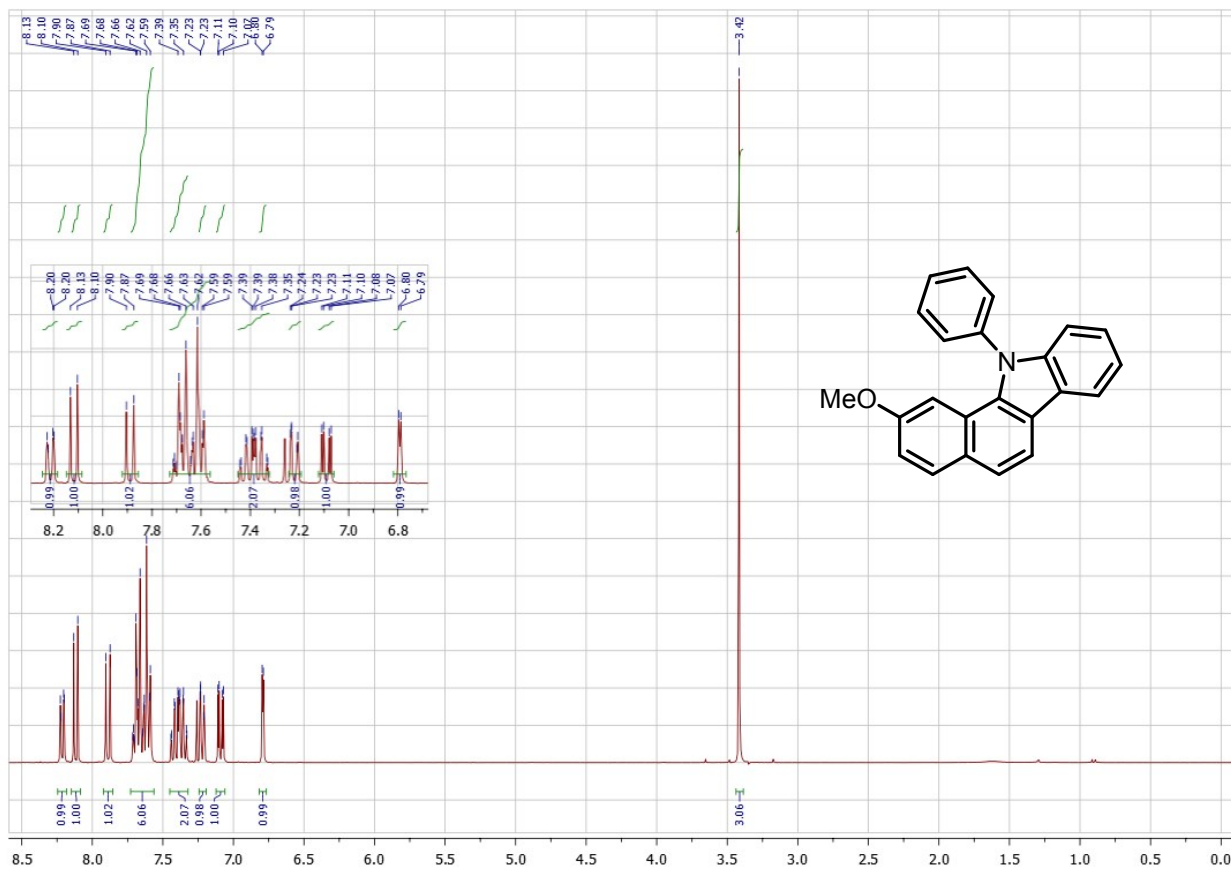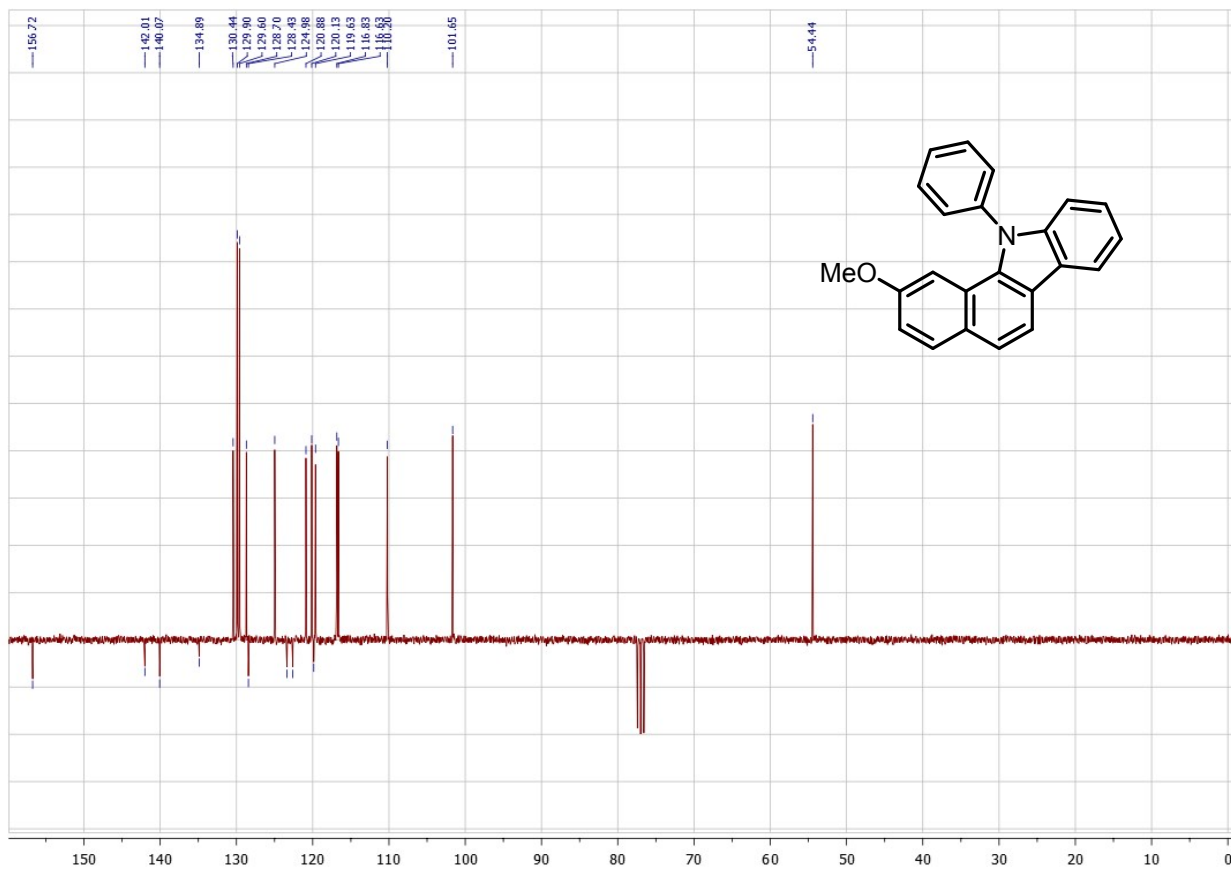

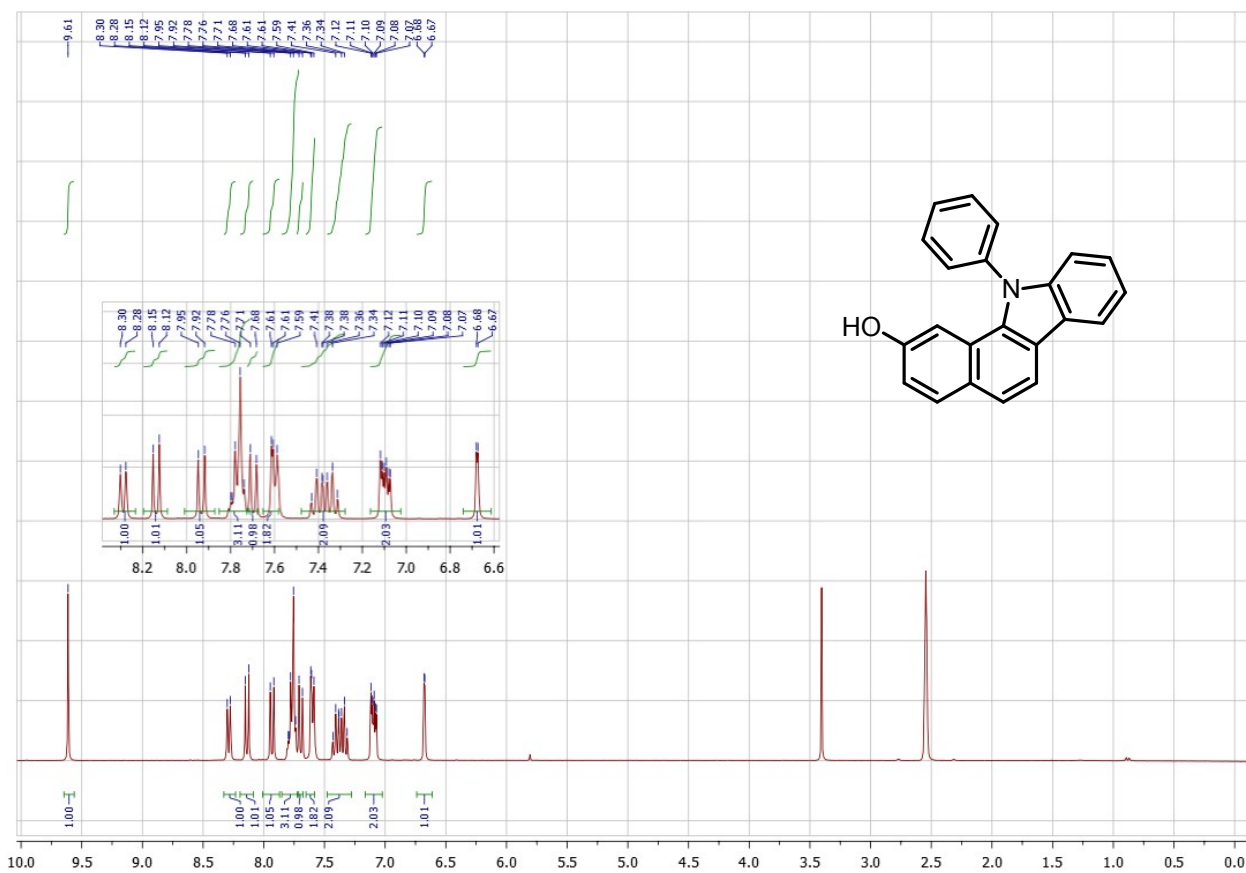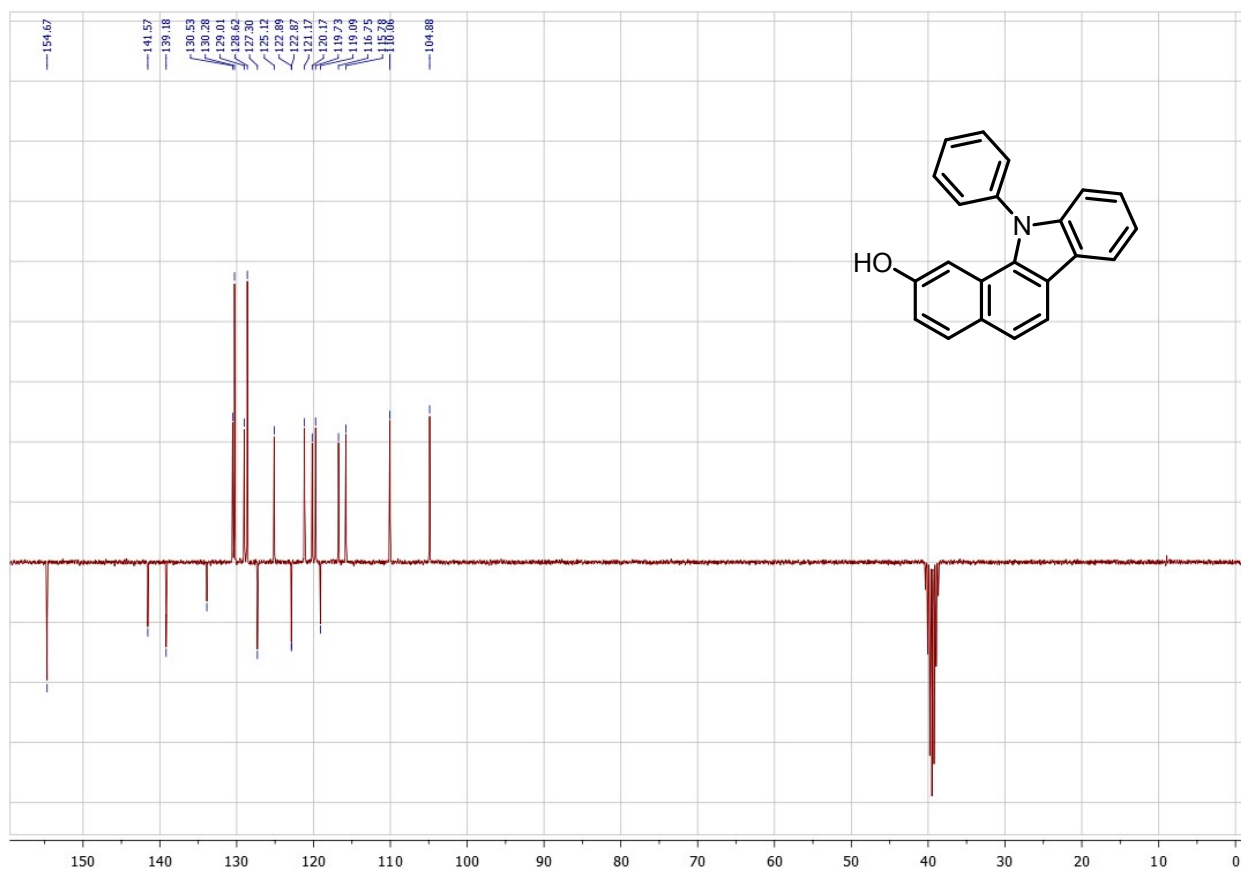

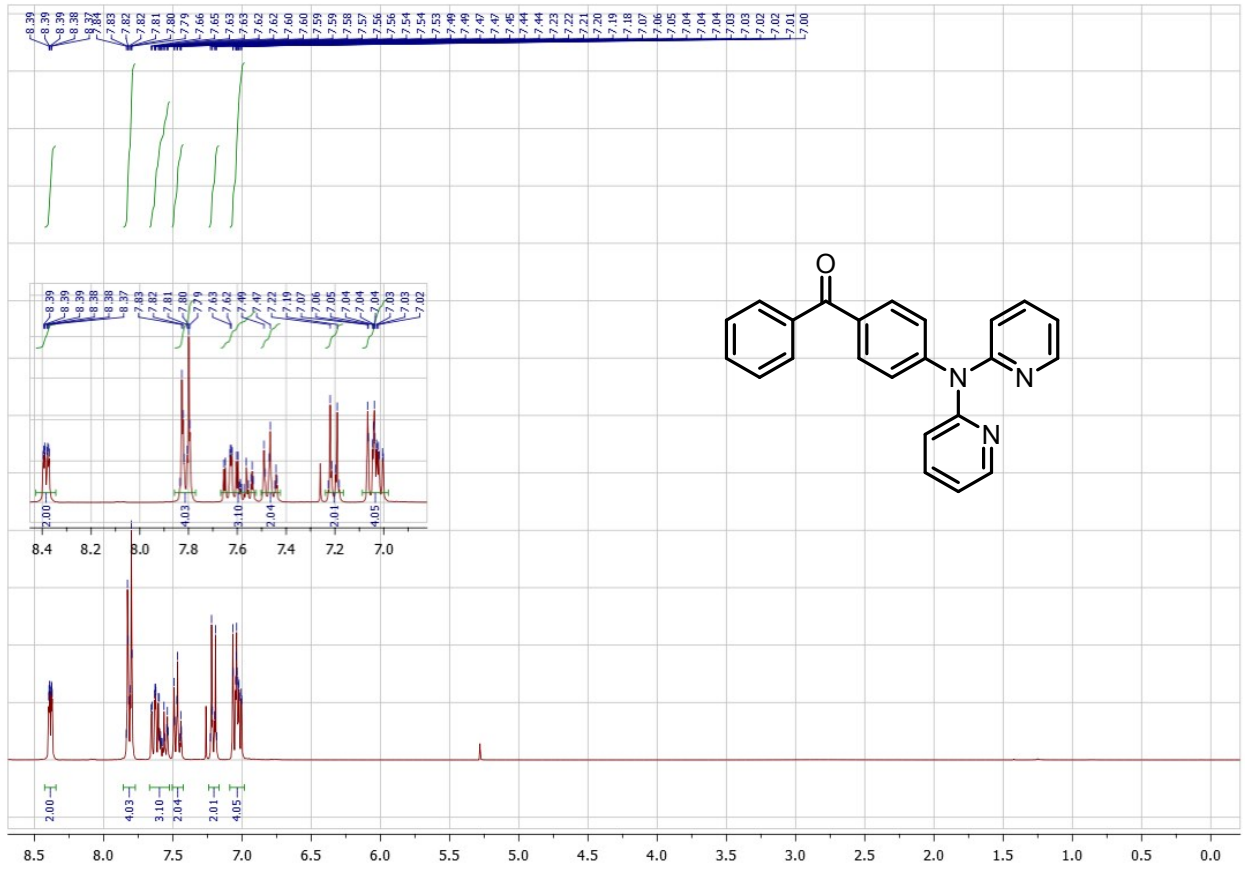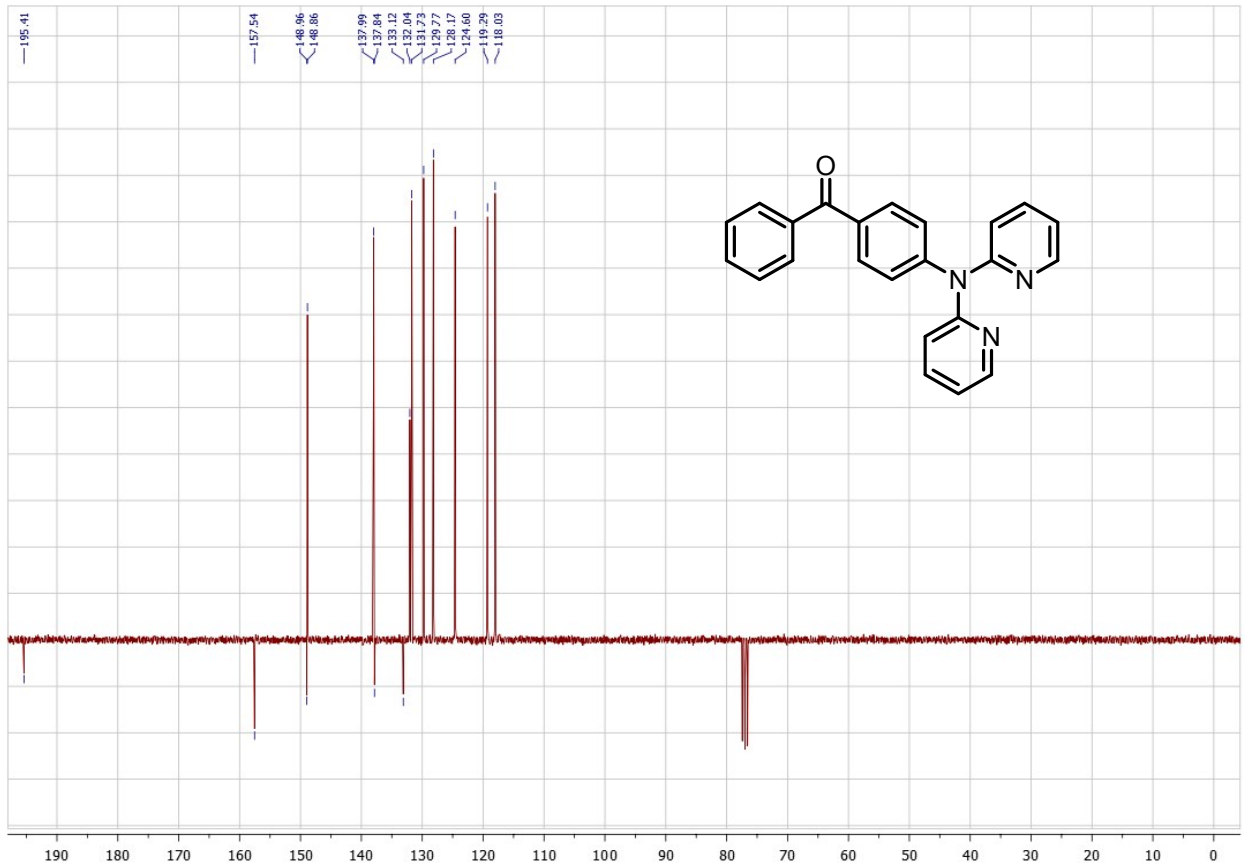

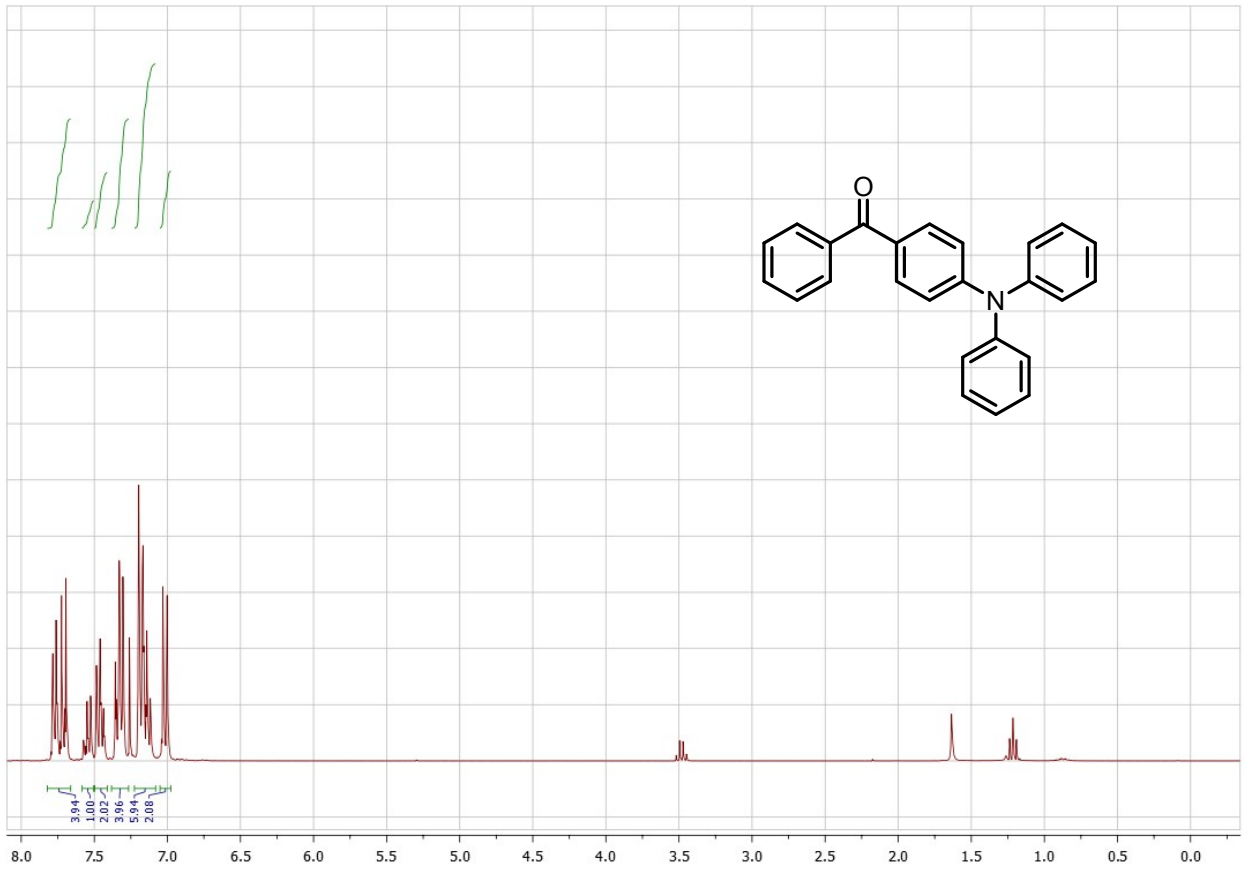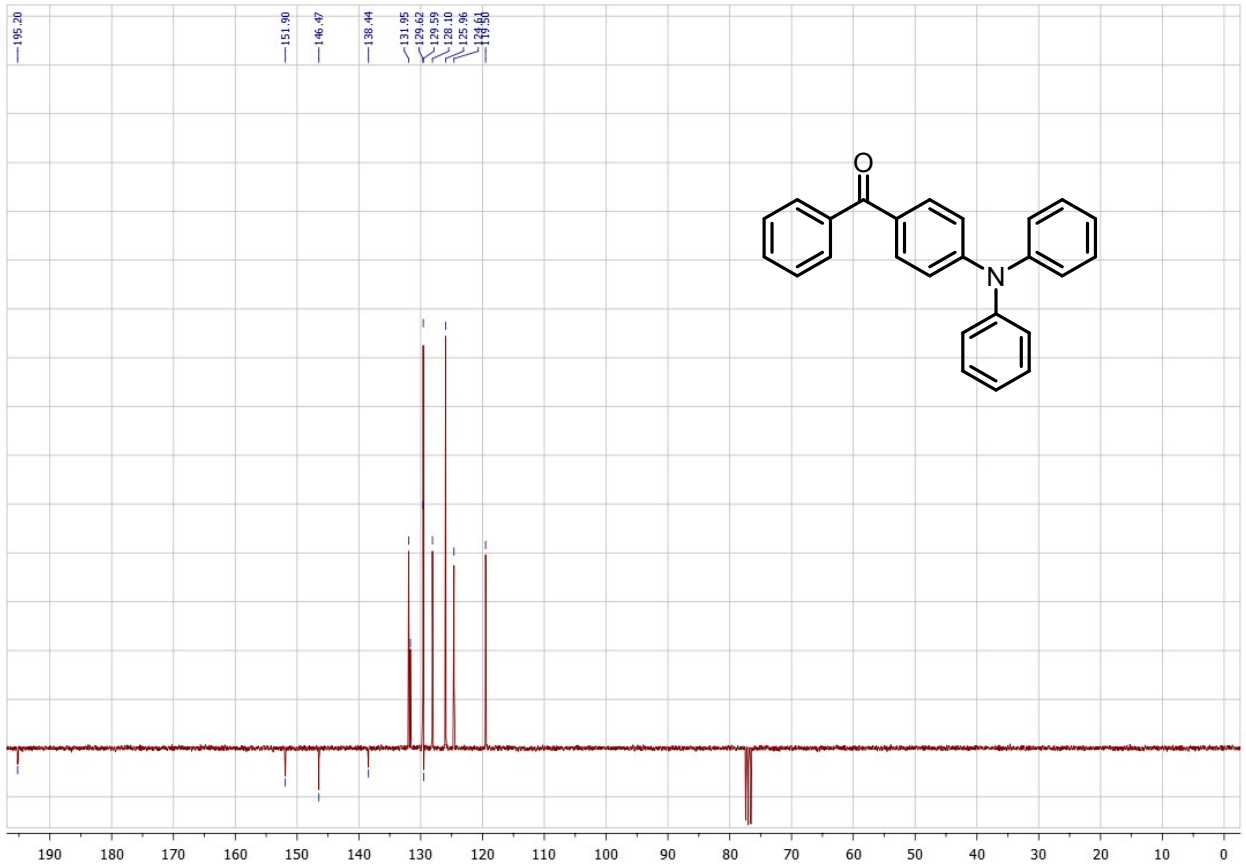

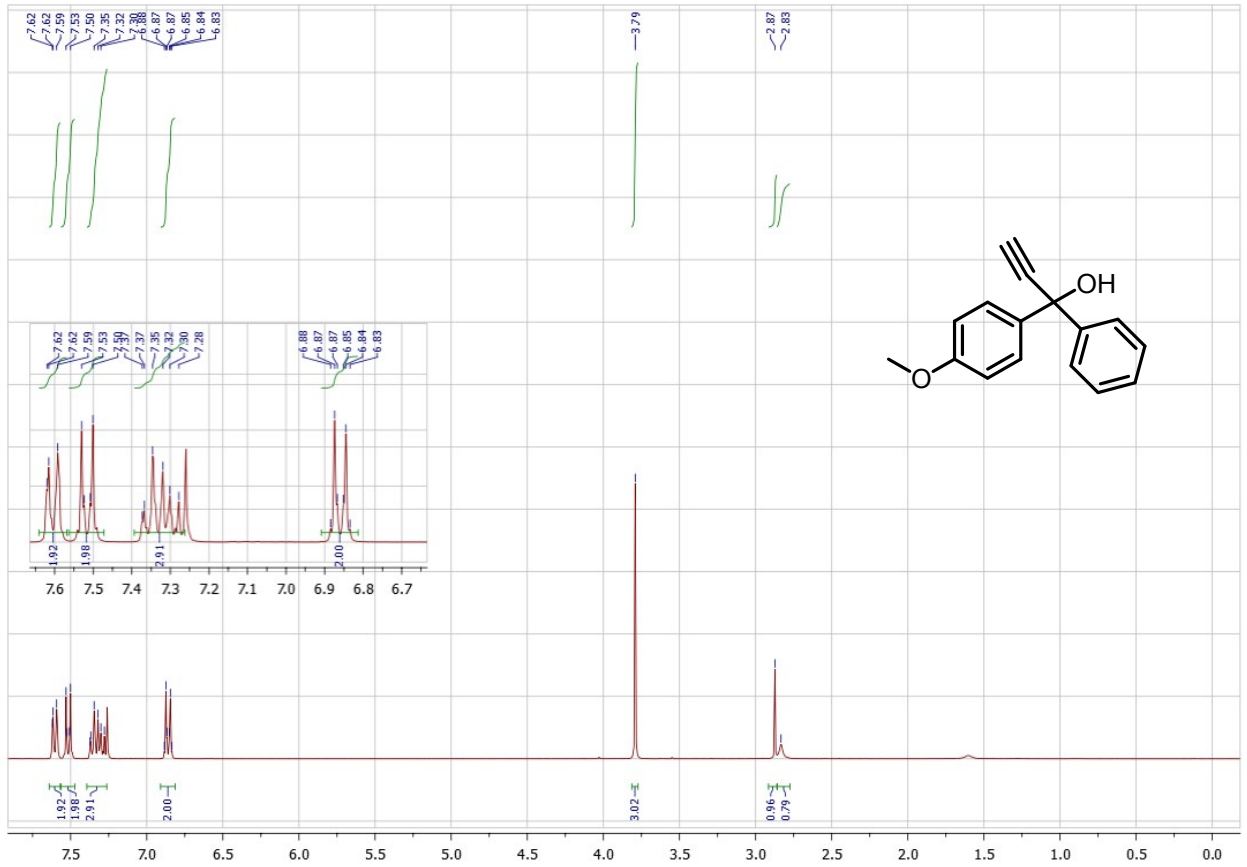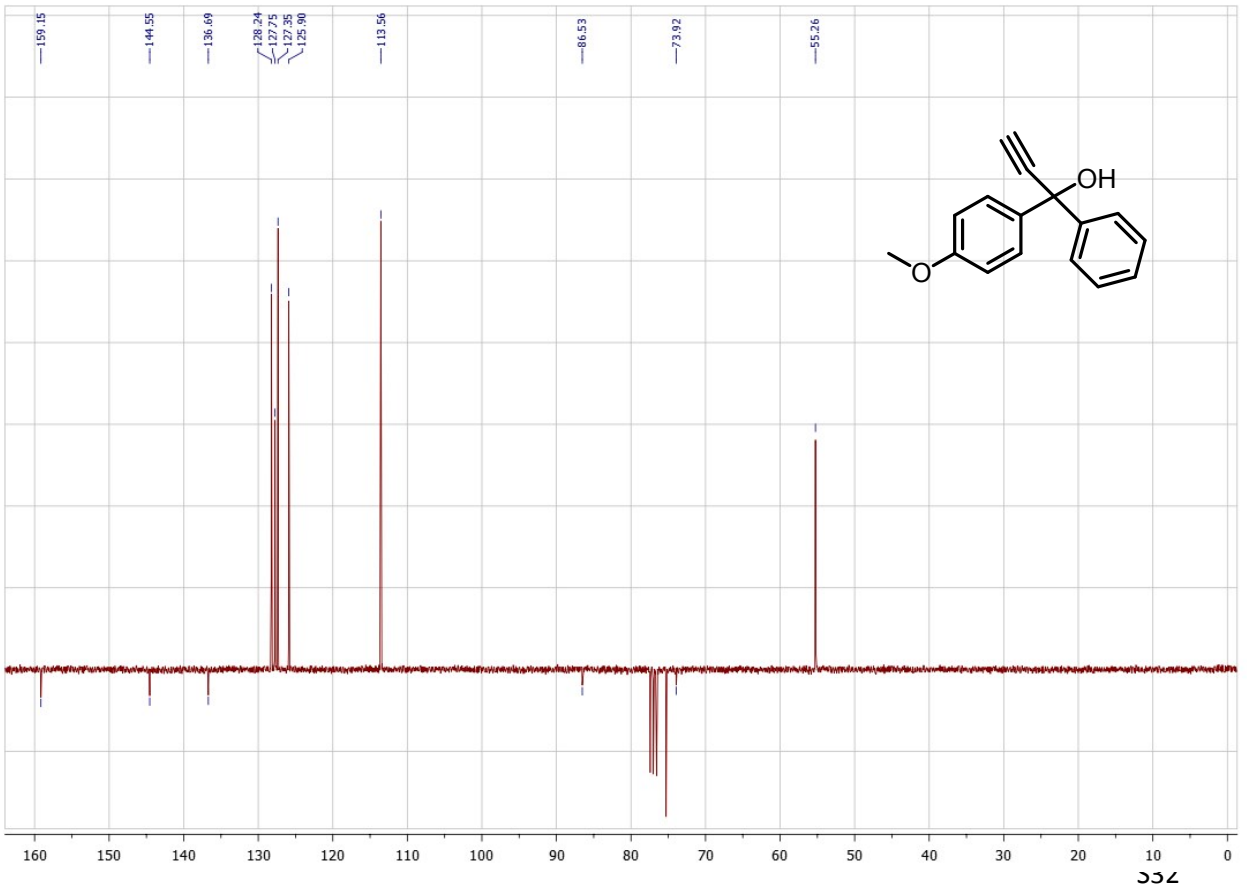



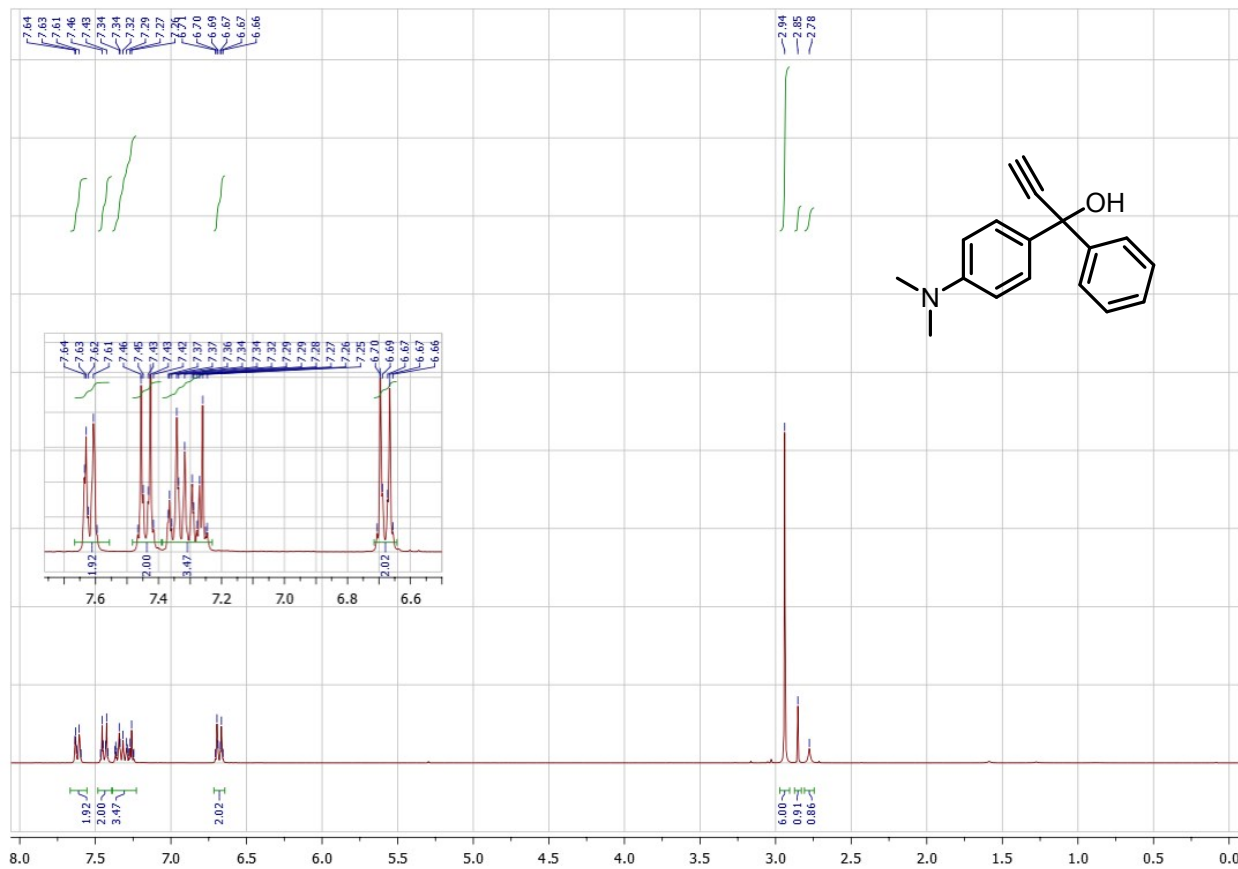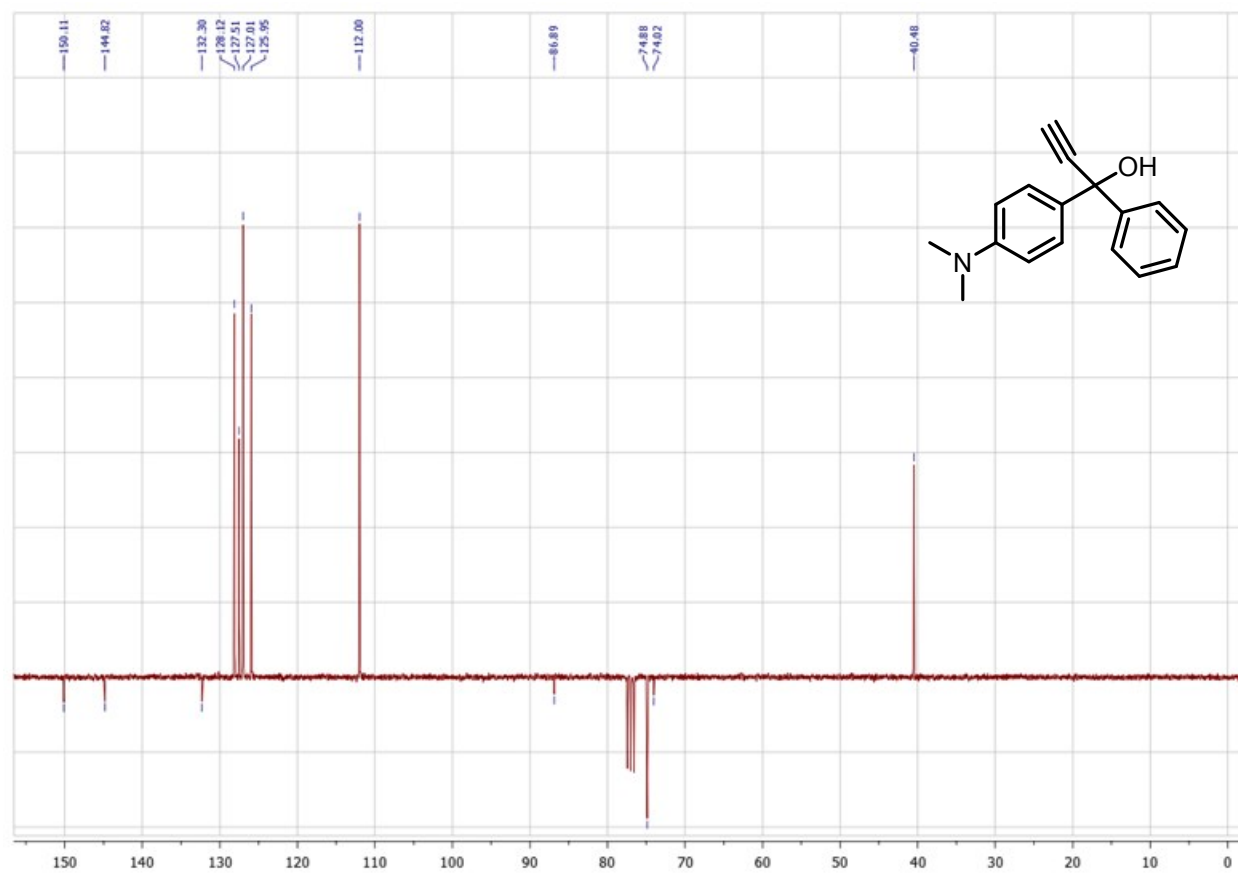

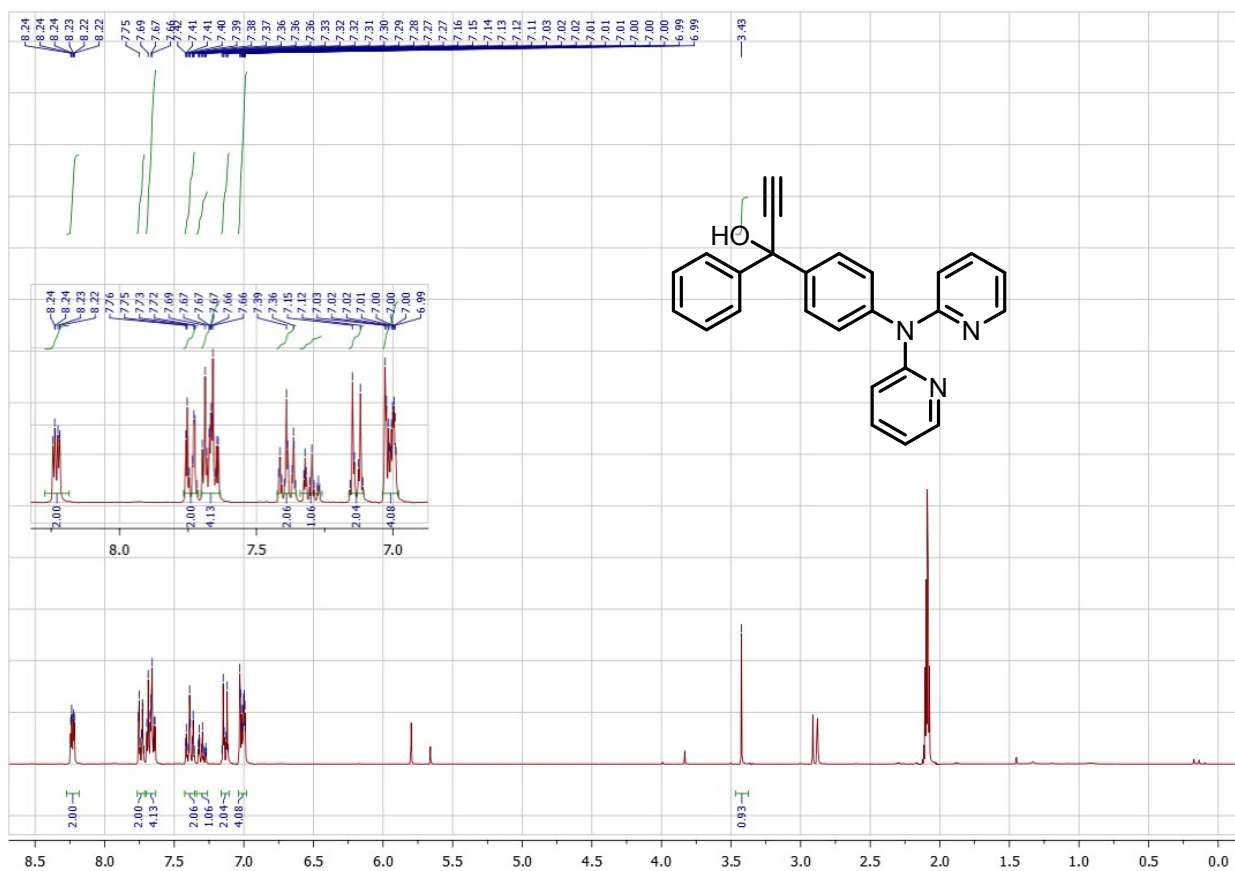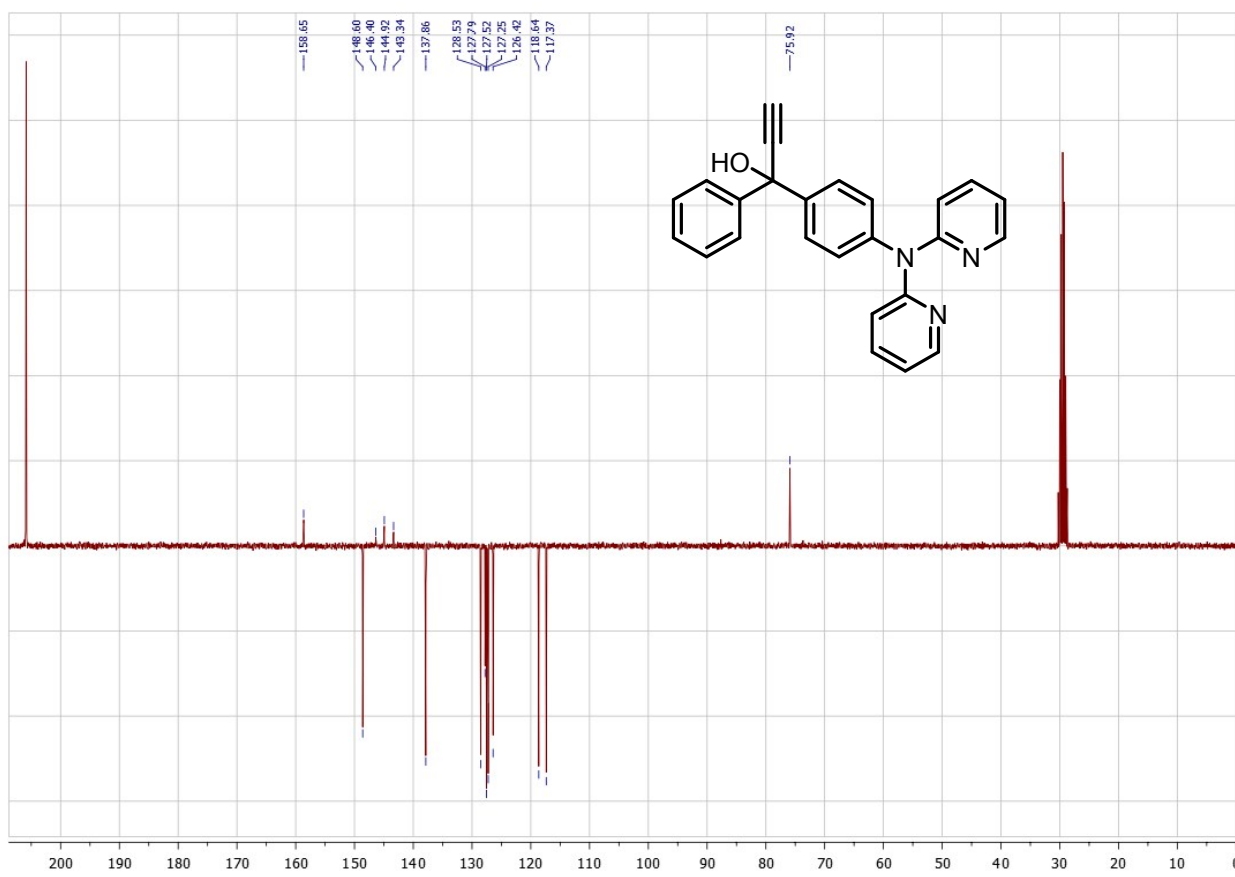

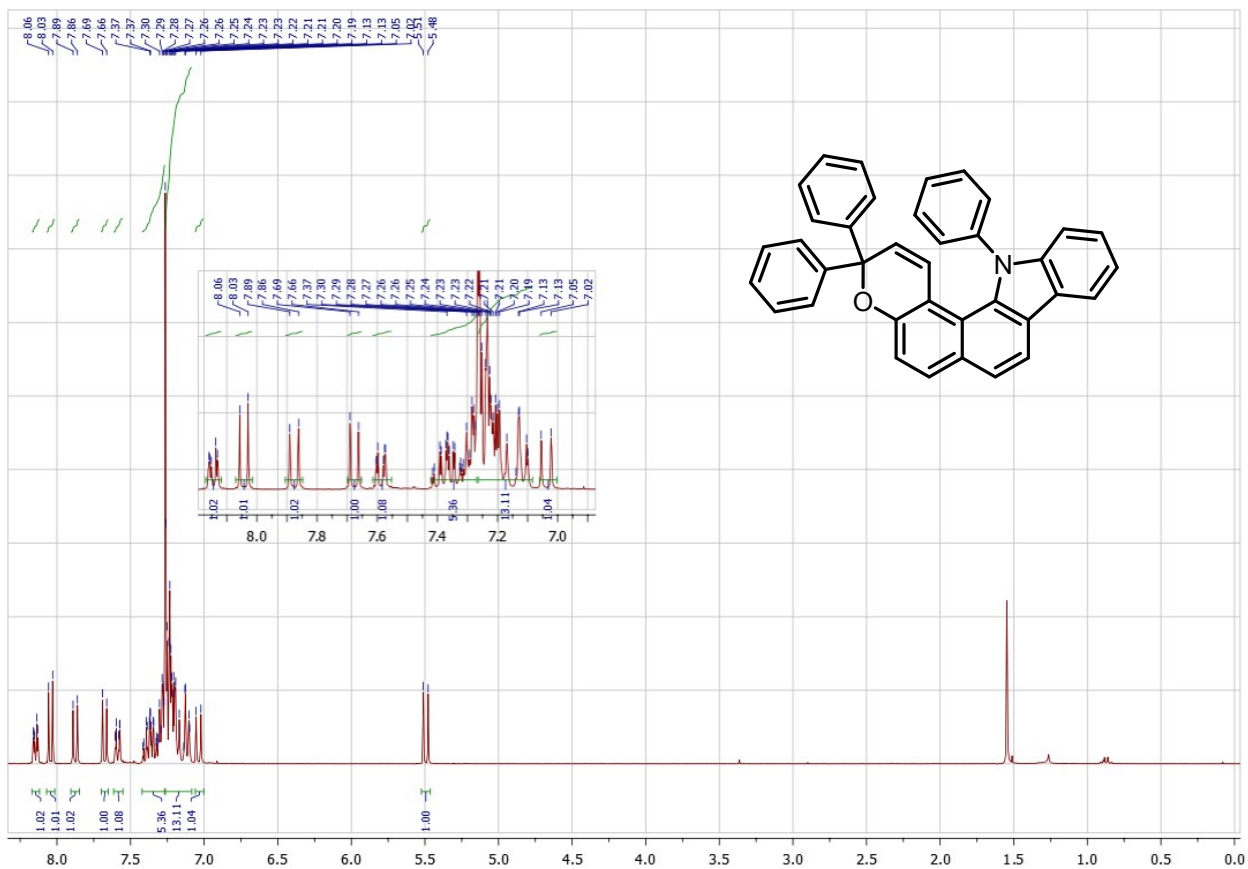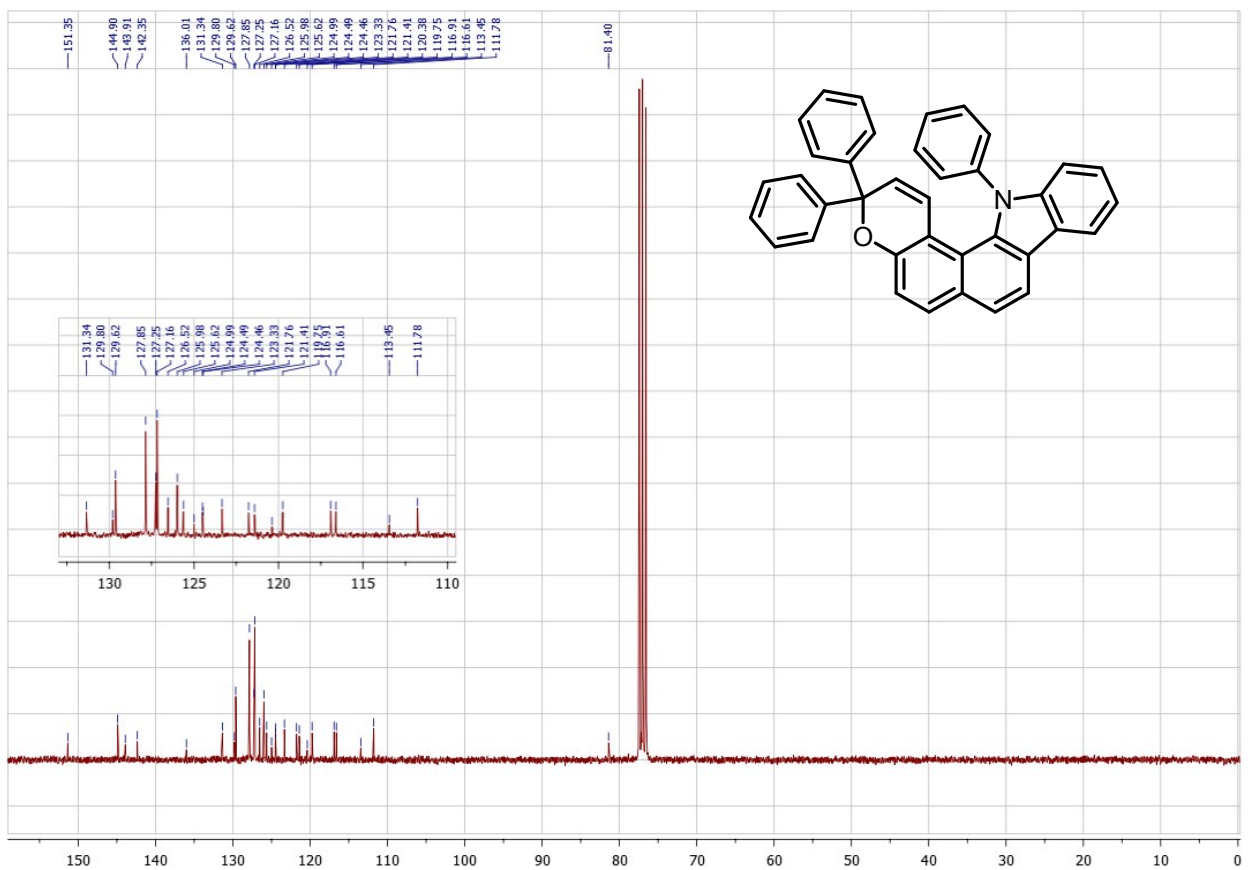

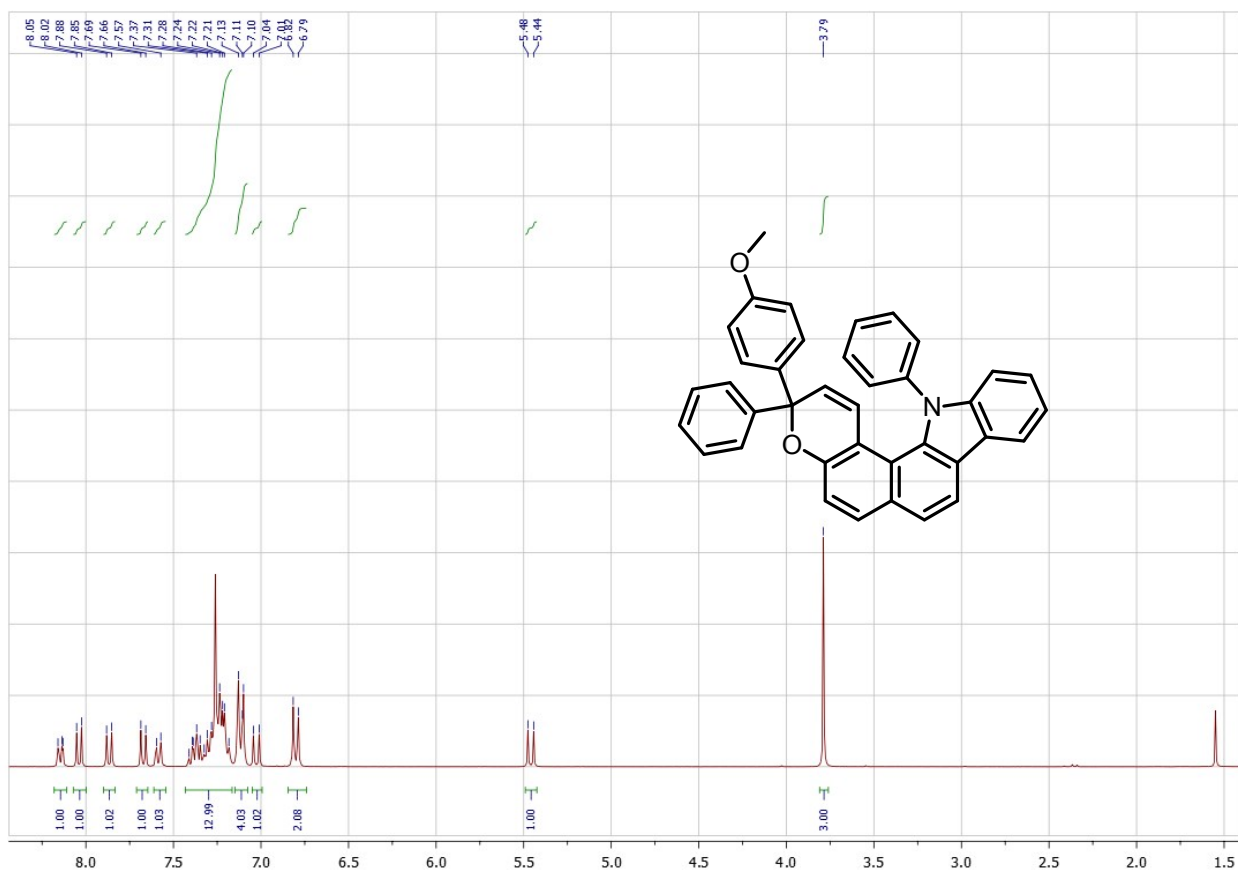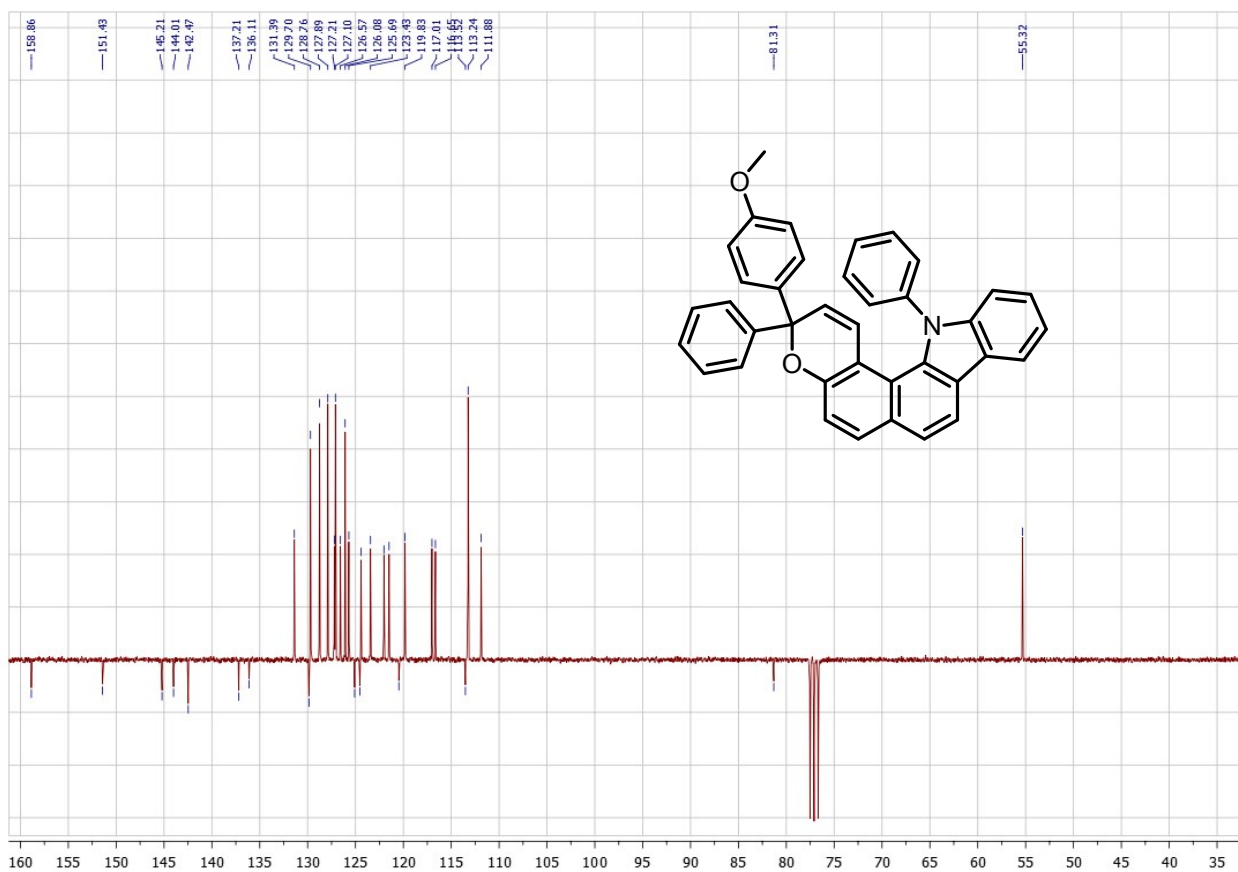

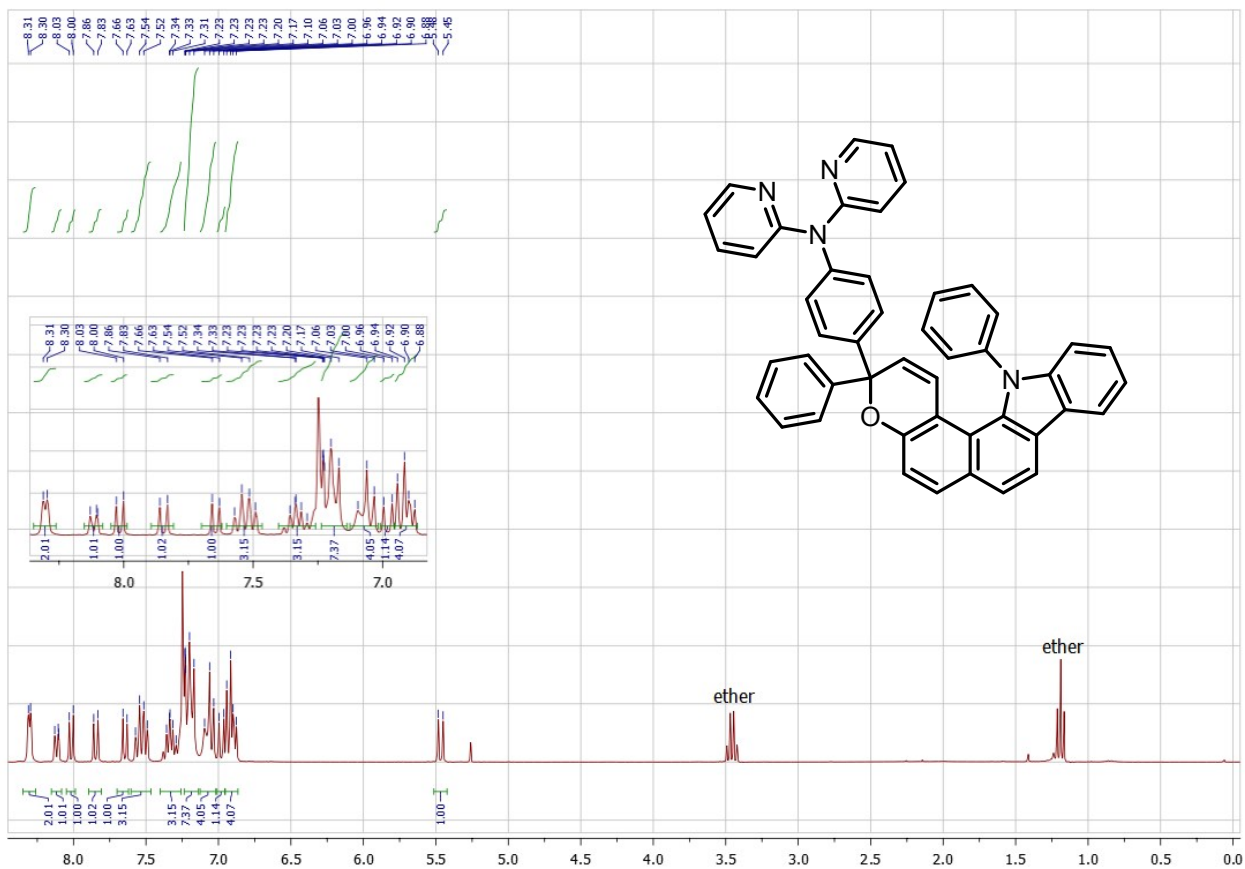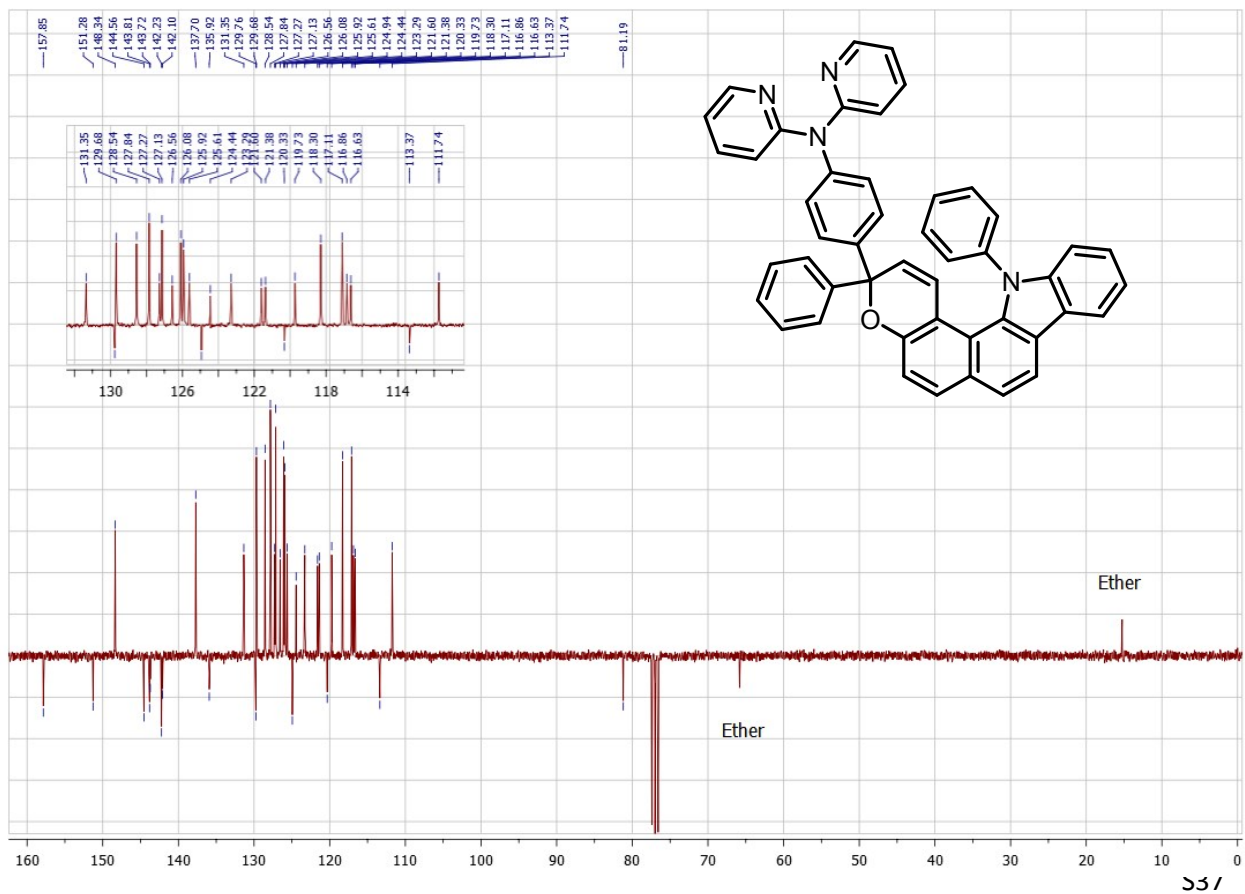

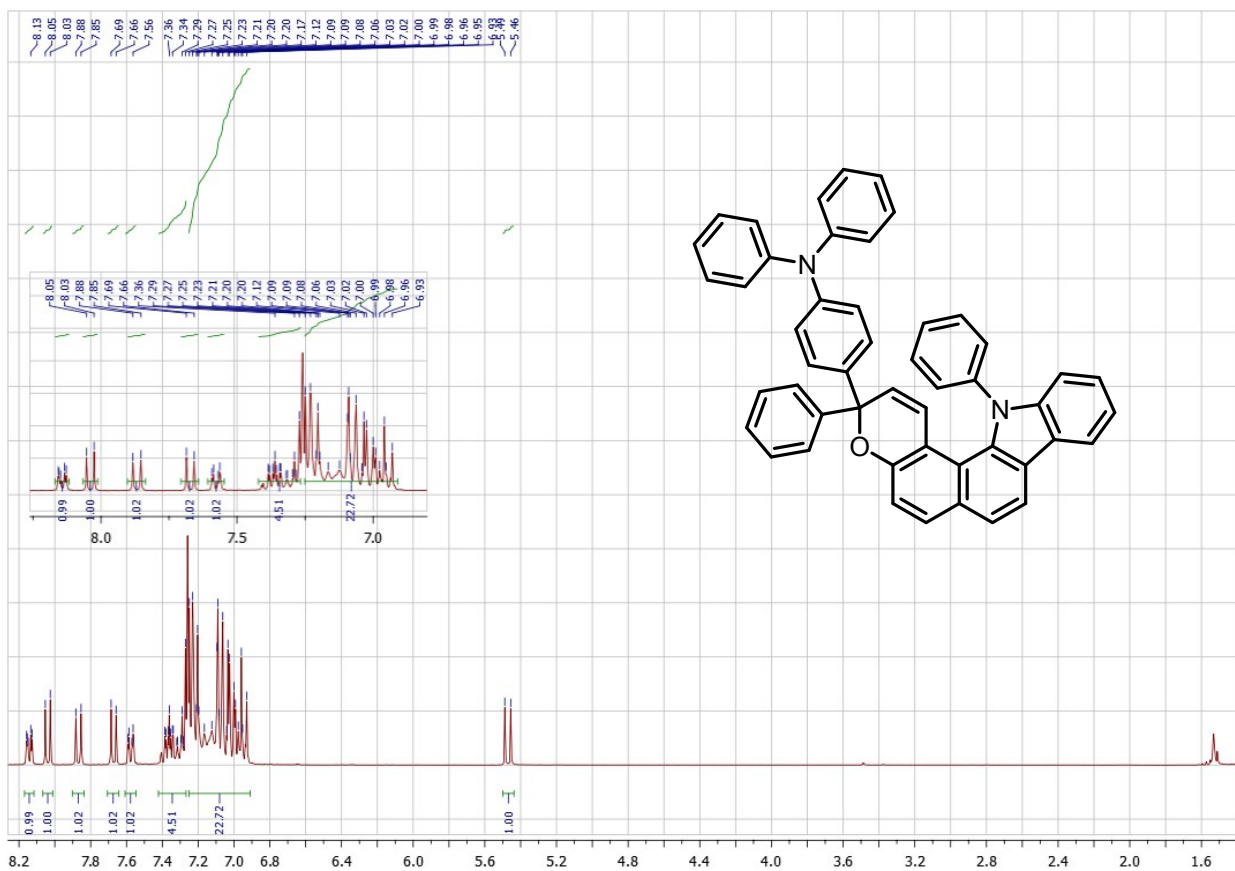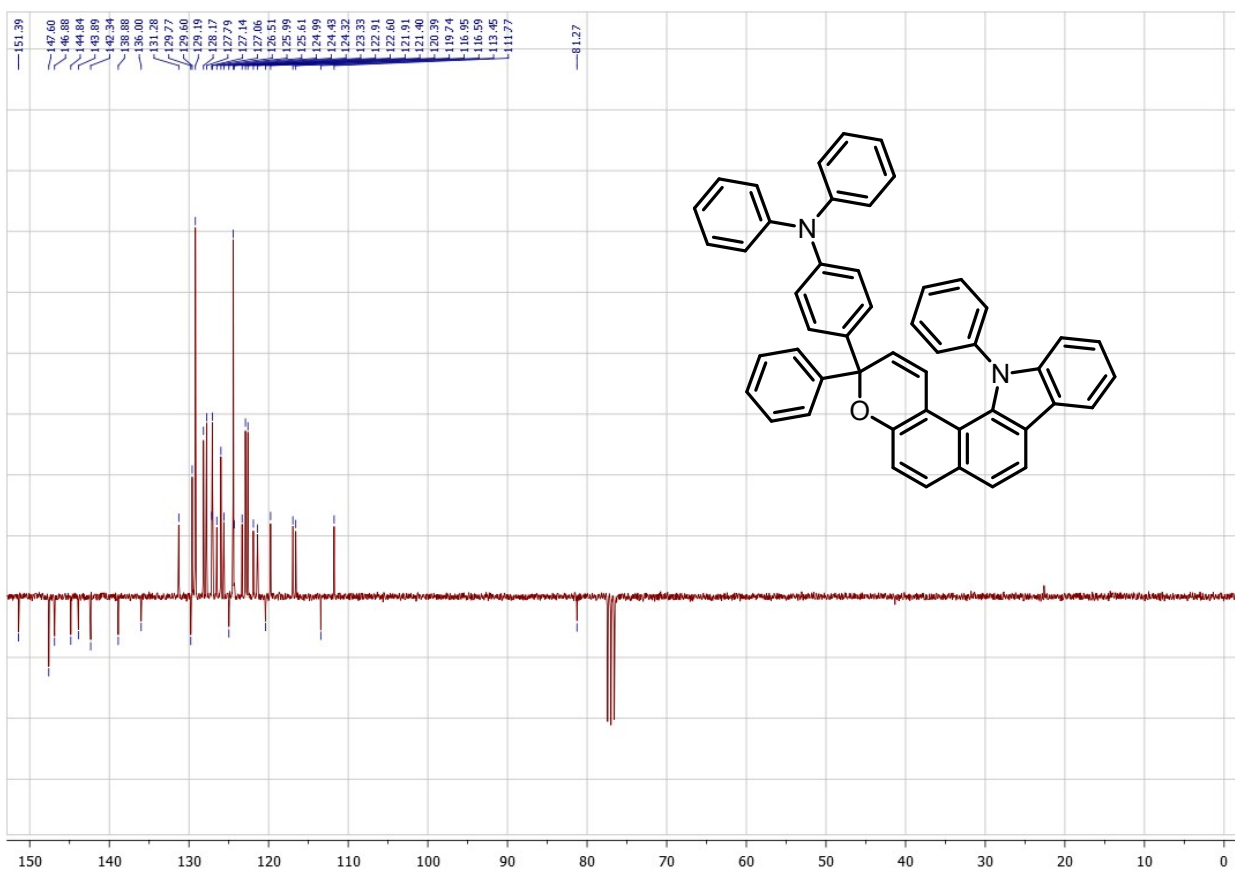

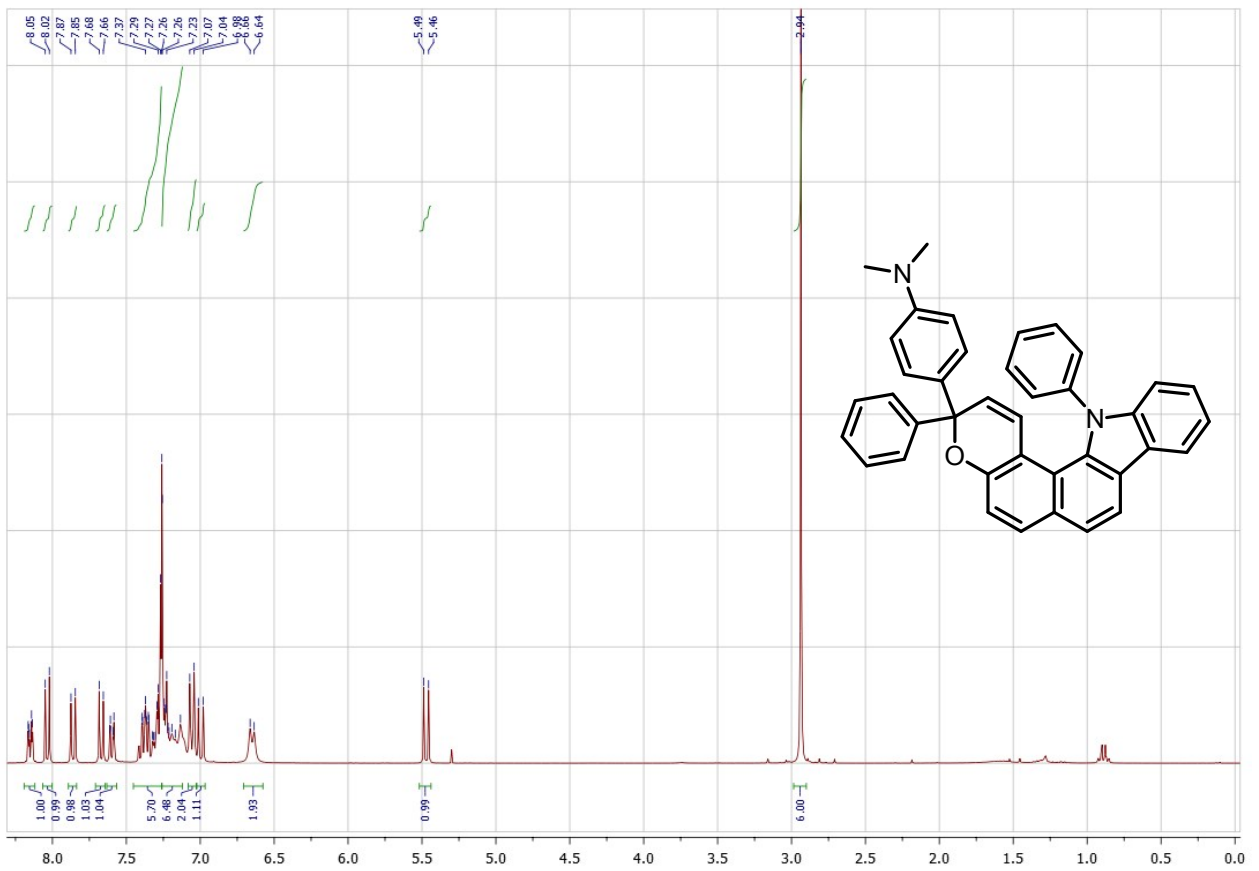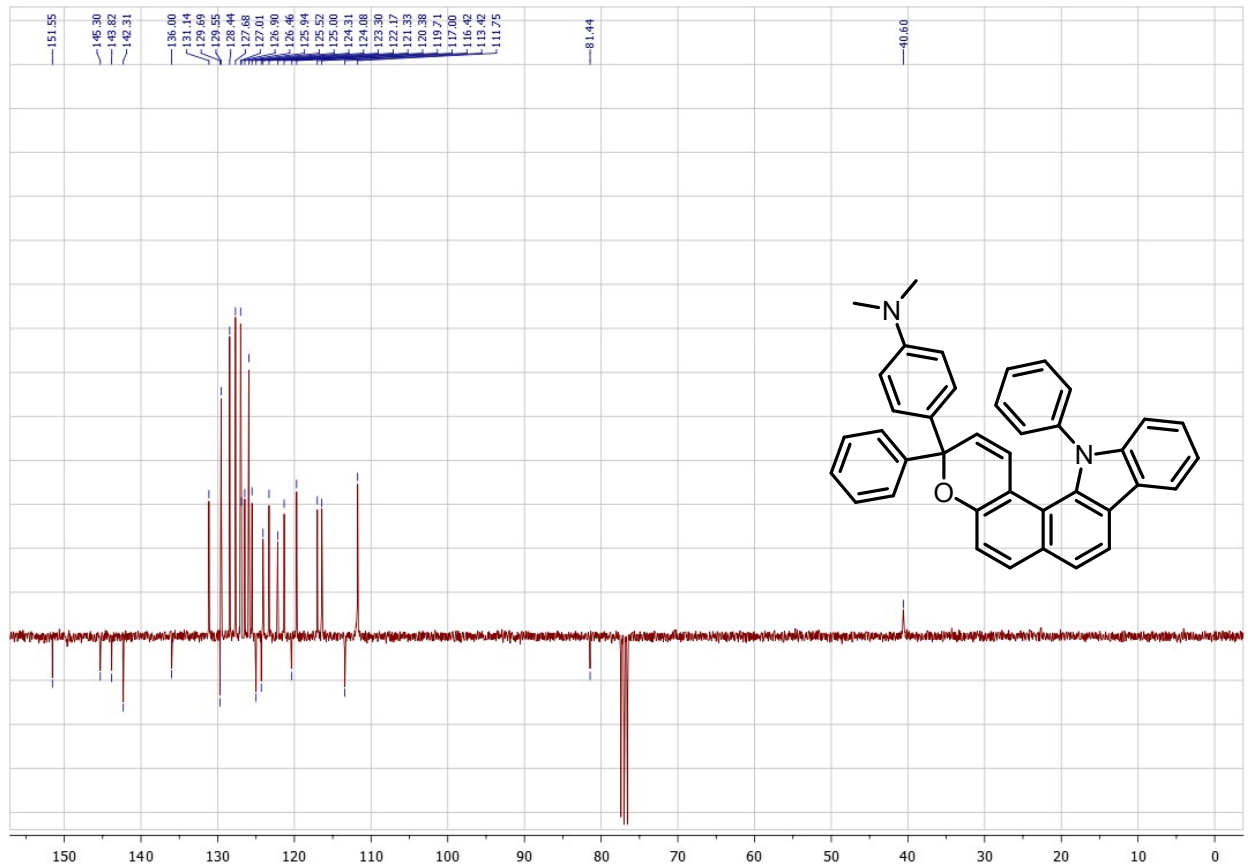

## UV-VIS MEASUREMENTS

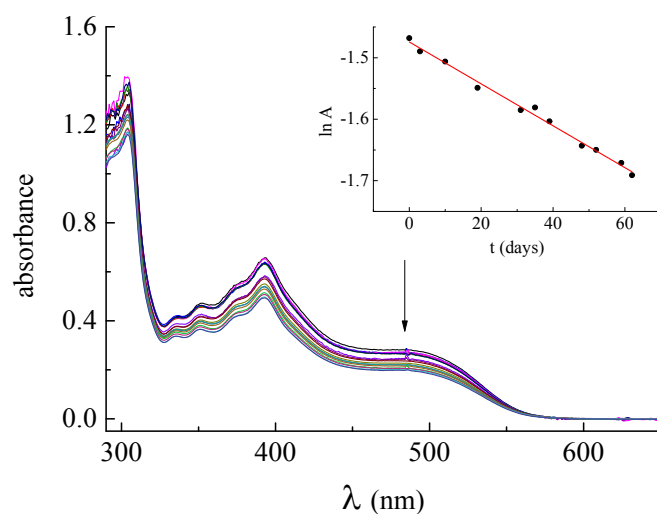

Figure S3. Absorption spectra recorded over a period of five months during the thermal decolouration of CN-Ph-H in toluene. Inset: linear interpolation using the absorbance data at 500 nm.

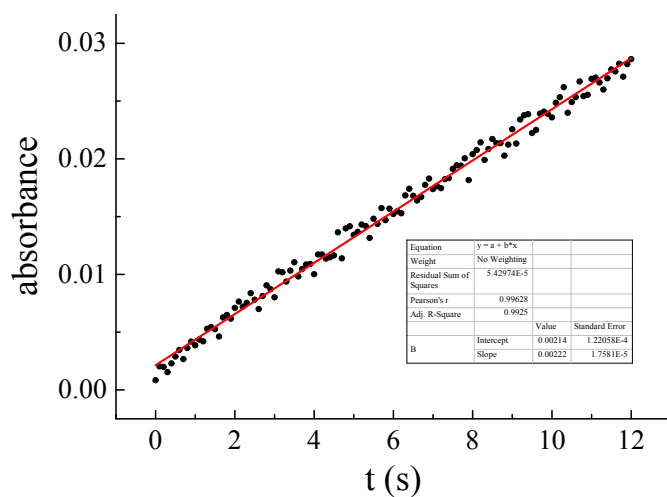

Figure S4. Linear interpolation of the first seconds of the UV photocoloration kinetics of CN-Ph-H in toluene, according to equation 5.



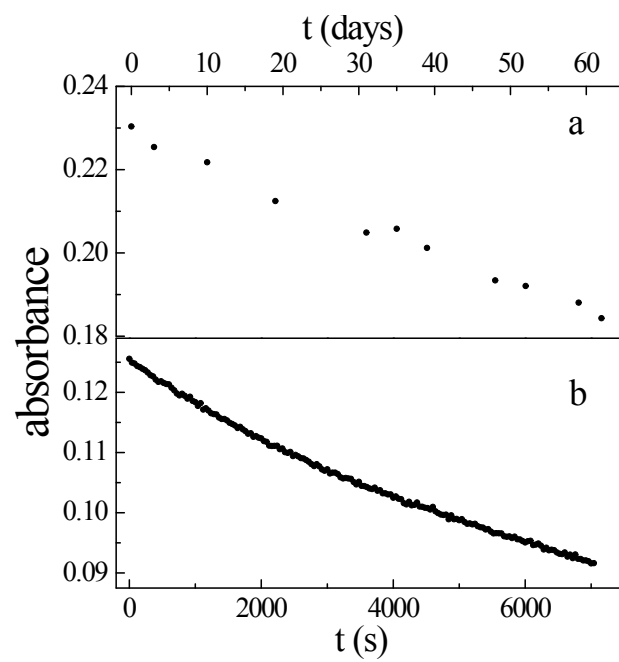

Figure S5. Decay plots of the TT isomers of CN-Ph-H (a) and CN-Ph-N(methyl)<sub>2</sub> (b) in toluene at room temperature in the dark.

## REFERENCES

---

1. M.M. Oliveira, M.A. Salvador, P.J. Coelho and L.M. Carvalho, New benzopyranocarbazoles: synthesis and photochromic behavior, *Tetrahedron*, 2005, **61**, 1681–1691.
